# Supplementary material for: The correlation of region-specific lifestyle and subjective perception of oral health with oral health-related quality of life among Tibetan early adolescents in Ganzi: a cross-sectional study
Source: PeerJ. 2025 Jan 24;13:e18842. doi: 10.7717/peerj.18842 (PMC11771303; doi:10.7717/peerj.18842)
Supplement: Supplemental Information 1 [file peerj-13-18842-s001.xlsx]

## Sheet: Sheet1
Supplementary Table S1. Questionnaire
Question		Answer
Demographic characteristics	1. Gender	1. Male 2. Female
	2.age
Socio-economic status	3. Household type	1. Non-agricultural family 2. Agricultural family
	4. Maternal education	1.Never received formal education 2. Primary school education 3. Junior high school education 4. High school education 5. Secondary Vocational School Education 6. Tree-year college Education 7. Bachelor's Degree 8. Master’s degree or above 9. Unknown or orphan
Region-specific lifestyle	5. Permanent residence address
	6. Your brick tea consumption	1. Drink 2. Rarely or Never
	7. Brick tea consumption by your mother	1. Drink 2. Rarely or Never
	8. Are you boarding at school in the most recent year	1. Yes 2. No
Subjective perception on oral health	9. How do you evaluate your oral conditions?	1. Good or very good 2. Fair 3. Poor or very poor
	10. Have you had a toothache in the past 12 months	1. Yes 2. No 3. Unknown
