# Supplementary material for: The correlation of region-specific lifestyle and subjective perception of oral health with oral health-related quality of life among Tibetan early adolescents in Ganzi: a cross-sectional study
Source: PeerJ. 2025 Jan 24;13:e18842. doi: 10.7717/peerj.18842 (PMC11771303; doi:10.7717/peerj.18842)
Supplement: Supplemental Information 2 [file peerj-13-18842-s002.xlsx]

## Sheet: Sheet1
Supplementary Table2. Binary logistic regression analysis of the associations between sC-OIDP scores and predictors in three domains.
Variables		physical domain			psychological domain			social domain
		Participants with sC-OIDP<50	Participants with sC-OIDP>50	ORadjusted #(95%CI)	Participants with sC-OIDP<50	Participants with sC-OIDP>50	ORadjusted #(95%CI)	Participants with sC-OIDP<50	Participants with sC-OIDP>50	ORadjusted #(95%CI)
		Count (%)	Count (%)		Count (%)	Count (%)		Count (%)	Count (%)
Residence altitude
	1400 m	63 (35.0)	117 (65.0)	Reference group	72 (40.0)	108 (60.0)	Reference group	74 (41.1)	106 (58.9)	Reference group
	2560 m	84 (43.3)	110 (56.7)	0.81 (0.52-1.26)	81 (41.8)	113 (58.2)	1.10 (0.71-1.72)	92 (47.4)	102 (52.6)	0.91 (0.59-1.40)
	3300 m	24 (21.6)	87 (78.4)	1.86 (1.05-3.27)*	37 (33.3)	74 (66.7)	1.39 (0.83-2.34)	27 (24.3)	84 (75.7)	2.25 (1.30-3.89)**
Buttered tea consumption by children
	Don't drink	20 (45.5)	24 (54.5)	Reference group	23 (52.3)	21 (47.7)	Reference group	21 (47.7)	23 (52.3)	Reference group
	Drink	151 (34.2)	290 (65.8)	1.46 (0.77-2.78)	167 (37.9)	274 (62.1)	1.87 (0.99-3.55)	172 (39.0)	269 (61.0)	1.40 (0.74-2.64)
Buttered tea consumption by mother
	Don't drink	18 (43.9)	23 (56.1)	Reference group	18 (43.9)	23 (56.1)	Reference group	15 (36.6)	26 (63.4)
	Drink	152 (34.5)	289 (65.5)	1.40 (0.72-2.72)	170 (38.5)	271 (61.5)	1.32 (0.68-2.56)	177 (40.1)	264 (59.9)	0.87 (0.44-1.72)
	Unknown or orphan	1 (33.3)	2 (66.7)		2 (66.7)	1 (33.3)		1 (33.3)	2 (66.7)
Boarding student
	No	121 (43.5)	157 (56.5)	Reference group	48 (40.3)	71 (59.7)	Reference group	122 (43.9)	156 (56.1)	Reference group
	Yes	50 (24.2)	157 (75.8)	2.18 (1.43-3.32)***	142 (38.8)	224 (61.2)	1.20 (0.80-1.78)	71 (34.3)	136 (65.7)	1.35 (0.91-2.01)
Self-reported oral health
	Good or very good	53 (45.7)	63 (54.3)	Reference group	62 (53.4)	54 (46.6)	Reference group	54 (46.6)	62 (53.4)	Reference group
	Fair	96 (35.3)	176 (64.7)	1.48 (0.94-2.32)	109 (40.1)	163 (59.9)	1.67 (1.07-2.60)*	113 (41.5)	159 (58.5)	1.18 (0.75-1.84)
	Poor or very poor	22 (22.7)	75 (77.3)	2.66 (1.45-4.90)**	19 (19.6)	78 (80.4)	4.51 (2.41-8.44)***	26 (26.8)	71 (73.2)	2.29 (1.27-4.14)**
Self-reported general health
	Good or very good	110 (41.5)	155 (58.5)	Reference group	116 (43.8)	149 (56.2)	Reference group	113 (42.6)	152 (57.4)	Reference group
	Fair	56 (29.3)	135 (70.7)	1.58 (1.05-2.38)*	69 (36.1)	122 (63.9)	1.25 (0.84-1.85)	73 (38.2)	118 (61.8)	1.08 (0.73-1.60)
	Poor or very poor	5 (17.2)	24 (82.8)	2.95 (1.80-8.03)*	5 (17.2)	24 (82.8)	3.36 (1.23-9.16)*	7 (24.1)	22 (75.9)	2.06 (0.84-5.05)
Dental pain
	No	64 (51.2)	61 (48.8)	Reference group	63 (50.4)	62 (49.6)	Reference group	62 (49.6)	63 (50.4)	Reference group
	Yes	83 (26.5)	230 (73.5)	3.12 (2.00-4.86)***	104 (33.2)	209 (66.8)	2.19 (1.42-3.37)***	111 (35.5)	202 (64.5)	1.84 (1.20-2.81)**
	Unknown	24 (51.1)	23 (48.9)		23 (48.9)	24 (51.1)		20 (42.6)	27 (57.4)
BOP
	No	39 (32.8)	80 (67.2)	Reference group	48 (40.3)	71 (59.7)	Reference group	48 (40.3)	71 (59.7)	Reference group
	Yes	132 (36.1)	234 (63.9)	0.78 (0.50-1.22)	142 (38.8)	224 (61.2)	1.00 (0.65-1.54)	145 (39.6)	221 (60.4)	0.97 (0.63-1.49)
DC
	No	25 (29.8)	59 (70.2)	Reference group	31 (36.9)	53 (63.1)	Reference group	39 (46.4)	45 (53.6)	Reference group
	Yes	146 (36.4)	255 (63.6)	0.69 (0.41-1.16)	159 (39.7)	242 (60.3)	0.84 (0.51-1.37)	154 (38.4)	247 (61.6)	1.35 (0.84-2.19)
DMFT		171 (35.3)	314 (64.7)	0.90 (0.80-1.02)	190 (39.2)	295 (60.8)	0.95 (0.84-1.08)	193 (39.8)	292 (60.2)	0.88 (0.78-1.00)*
sC-OIDP, the Child Oral Impacts on Daily Performances score that standardized to the Sichuan adolescent mean score; ORcrude, crude odds ratio; ORadjusted, adjusted odds ratio; CI, confidence interval; BOP, gingival bleeding on probing; DC, dental calculus; DMFT, decayed, missing, and filled teeth. # Adjusting for age, gender, household type and maternal education. *P < .05, **P < .01, ***P < .001…
