# Supplementary material for: The correlation of region-specific lifestyle and subjective perception of oral health with oral health-related quality of life among Tibetan early adolescents in Ganzi: a cross-sectional study
Source: PeerJ. 2025 Jan 24;13:e18842. doi: 10.7717/peerj.18842 (PMC11771303; doi:10.7717/peerj.18842)
Supplement: Supplemental Information 3 [file peerj-13-18842-s003.xlsx]

## Sheet: Sheet1
Supplementary Table 3. Binary logistic regression analysis of the associations between sC-OIDP scores and predictors in eight items.
Variance		Eating			Speaking			Cleaning teeth			Sleeping			Grinning			Emotion			Studying			Social contact
tC-OIDP (mean±SD)		40.76±32.13			16.88±25.07			27.42±30.11			21.89±30.97			29.95±34.15			33.23±33.29			18.08±27.68			23.79±32.30
sC-OIDP (mean±SD)		52.50±11.08			52.52±12.05			51.55±10.99			53.45±12.89			52.21±11.45			53.78±11.64			54.72±14.11			52.52±12.17
Residence altitude		Participants with sC-OIDP<50 count (%)	Participants with sC-OIDP>50 count (%)	#P value	Participants with sC-OIDP<50 count (%)	Participants with sC-OIDP>50 count (%)	#P value	Participants with sC-OIDP<50 count (%)	Participants with sC-OIDP>50 count (%)	#P value	Participants with sC-OIDP<50 count (%)	Participants with sC-OIDP>50 count (%)	#P value	Participants with sC-OIDP<50 count (%)	Participants with sC-OIDP>50 count (%)	#P value	Participants with sC-OIDP<50 count (%)	Participants with sC-OIDP>50 count (%)	#P value	Participants with sC-OIDP<50 count (%)	Participants with sC-OIDP>50 count (%)	#P value	Participants with sC-OIDP<50 count (%)	Participants with sC-OIDP>50 count (%)	#P value
	1400 m	119 (66.1)	61 (33.9)		120 (66.7)	60 (33.3)		72 (40.0)	108 (60.0)		108 (60.0)	72 (40.0)		82 (45.6)	98 (54.4)		69 (38.3)	111 (61.7)		114 (63.3)	66 (36.7)		104 (57.8)	76 (42.2)
	2560 m	134 (69.1)	60 (30.9)	0.515	131 (67.5)	63 (32.5)	0.698	102 (52.6)	92 (47.4)	0.045*	114 (58.8)	80 (41.2)	0.347	97 (50.0)	97 (50.0)	0.541	81 (41.8)	113 (58.2)	0.927	134 (69.1)	60 (30.9)	0.497	121 (62.4)	73 (37.6)	0.867
	3300 m	54 (48.6)	57 (51.4)	0.011*	42 (37.8)	69 (62.2)	<.001***	39 (35.1)	72 (64.9)	0.635	58 (52.3)	53 (47.7)	0.139	40 (36.0)	71 (64.0)	0.122	31 (27.9)	80 (72.1)	0.036*	54 (48.6)	57 (51.4)	0.012*	44 (39.6)	67 (60.4)	0.002**
Buttered tea consumption by children
	Don't drink	29 (65.9)	15 (34.1)		32 (72.7)	12 (27.3)		22 (50.0)	22 (50.0)		27 (61.4)	17 (38.6)		22 (50.0)	22 (50.0)		22 (50.0)	22 (50.0)		31 (70.5)	13 (29.5)		28 (63.6)	16 (36.4)
	Drink	278 (63.0)	163 (37.0)	0.814	261 (59.2)	180 (40.8)	0.151	191 (43.3)	250 (56.7)	0.399	253 (57.4)	188 (42.6)	0.569	197 (44.7)	244 (55.3)	0.595	159 (36.1)	282 (63.9)	0.09	271 (61.5)	170 (38.5)	0.247	241 (54.6)	200 (45.4)	0.277
Buttered tea consumption by mother
	Don't drink	28 (68.3)	13 (31.7)		30 (73.2)	11 (40.6)		20 (48.8)	21 (51.2)		23 (56.1)	18 (43.9)		22 (53.7)	19 (46.3)		15 (36.6)	26 (63.4)		29 (70.7)	12 (29.3)		21 (51.2)	20 (48.8)
	Drink	277 (62.8)	164 (37.2)	0.686	262 (59.4)	179 (40.6)	0.1	192 (43.5)	249 (56.5)	0.58	255 (57.8)	186 (42.2)	0.984	196 (44.4)	245 (55.6)	0.303	165 (37.4)	276 (62.6)	0.926	272 (61.7)	169 (38.3)	0.205	247 (56.0)	194 (44.0)	0.543
	Unknown or orphan	2 (66.7)	1 (33.3)		1 (33.3)	2 (66.7)		1 (33.3)	2 (66.7)		2 (66.7)	1 (33.3)		1 (33.3)	2 (66.7)		1 (33.3)	2 (66.7)		1 (33.3)	2 (66.7)		1 (33.3)	2 (66.7)
Boarding student
	No	193 (69.4)	85 (30.6)		189 (68.0)	89 (32.0)		132 (47.5)	146 (52.5)		173 (62.2)	105 (37.8)		137 (49.3)	141 (50.7)		111 (39.9)	167 (60.1)		189 (68.0)	89 (32.0)		164 (59.0)	114 (41.0)
	Yes	114 (55.1)	93 (44.9)	0.003**	104 (50.2)	103 (49.8)	0.002**	81 (39.1)	126 (60.9)	0.217	107 (51.7)	100 (48.3)	0.034*	82 (39.6)	125 (60.4)	0.064	70 (33.8)	137 (66.2)	0.402	113 (54.6)	94 (45.4)	0.010*	105 (50.7)	102 (49.3)	0.216
Self-reported oral health
	Good or very good	77 (66.4)	39 (33.6)		80 (69.0)	36 (31.0)		63 (54.3)	53 (45.7)		84 (72.4)	32 (27.6)		65 (56.0)	51 (44.0)		59 (50.9)	57 (49.1)		85 (73.3)	31 (26.7)		67 (57.8)	49 (42.2)
	Fair	177 (65.1)	95 (34.9)	0.9	163 (59.9)	109 (40.1)	0.135	119 (43.8)	153 (56.3)	0.09	148 (54.4)	124 (45.6)	0.001**	127 (46.7)	145 (53.3)	0.105	101 (37.1)	171 (62.9)	0.019*	168 (61.8)	104 (38.2)	0.042*	155 (57.0)	117 (43.0)	0.954
	Poor or very poor	53 (54.6)	44 (45.4)	0.077	50 (51.5)	47 (48.5)	0.032*	31 (32.0)	66 (68.0)	0.003**	48 (49.5)	49 (50.5)	0.001**	27 (27.8)	70 (72.2)	<.001***	21 (21.6)	76 (78.4)	<.001***	49 (50.5)	48 (49.5)	0.001**	47 (48.5)	50 (51.5)	0.262
Self-reported general health
	Good or very good	184 (69.4)	81 (30.6)		183 (69.1)	82 (30.9)		124 (46.8)	141 (53.2)		167 (63.0)	98 (37.0)		126 (47.5)	139 (52.5)		110 (41.5)	155 (58.5)		180 (67.9)	85 (32.1)		150 (56.6)	115 (43.4)
	Fair	109 (57.1)	82 (42.9)	0.008**	99 (51.8)	92 (48.2)	0.001**	78 (40.8)	113 (59.2)	0.527	106 (55.5)	85 (44.5)	0.202	83 (43.5)	108 (56.5)	0.5	61 (31.9)	130 (68.1)	0.087	111 (58.1)	80 (41.9)	0.067	103 (53.9)	88 (46.1)	0.998
	Poor or very poor	14 (48.3)	15 (51.7)	0.024*	11 (37.9)	18 (62.1)	0.005**	11 (37.9)	18 (62.1)	0.558	7 (24.1)	22 (75.9)	<.001***	10 (34.)	19 (65.5)	0.242	10 (34.5)	19 (65.5)	0.689	11 (37.9)	18 (62.1)	0.004**	16 (55.2)	13 (44.8)	0.848
Dental pain
	No	101 (80.8)	24 (19.2)		85 (68.0)	40 (32.0)		71 (56.8)	54 (43.2)		90 (72.0)	35 (28.0)		68 (54.4)	57 (45.6)		60 (48.0)	65 (52.0)		96 (76.8)	29 (23.2)		76 (60.8)	49 (39.2)
	Yes	168 (53.7)	145 (46.3)	<.001***	185 (59.1)	128 (40.9)	0.067	120 (38.3)	193 (61.7)	<.001***	162 (51.8)	151 (48.2)	<.001***	131 (41.9)	182 (58.1)	0.014*	105 (33.5)	208 (66.5)	0.003**	174 (55.6)	139 (44.4)	<.001***	166 (53.0)	147 (47.0)	0.107
	Unknown	38 (80.9)	9 (19.1)		23 (48.9)	24 (51.1)		22 (46.8)	25 (53.2)		28 (59.6)	19 (40.4)		20 (42.6)	27 (57.4)		16 (34.0)	31 (66.0)		32 (68.1)	15 (31.9)		27 (57.4)	20 (42.6)
BOP
	No	76 (63.9)	43 (36.1)		68 (57.1)	51 (42.9)		47 (39.5)	72 (60.5)		69 (58.0)	50 (42.0)		60 (50.4)	59 (49.6)		47 (39.5)	72 (60.5)		72 (60.5)	47 (39.5)		61 (51.3)	58 (48.7)
	Yes	231 (63.1)	135 (36.9)	0.949	225 (61.5)	141 (38.5)	0.222	166 (45.4)	200 (54.6)	0.097	211 (57.7)	155 (42.3)	0.94	159 (43.4)	207 (56.6)	0.246	134 (36.6)	232 (63.4)	0.704	230 (62.8)	136 (37.2)	0.561	208 (56.8)	158 (43.2)	0.158
DC
	No	51 (60.7)	33 (39.3)		47 (56.0)	37 (44.0)		32 (38.1)	52 (61.9)		50 (59.5)	34 (40.5)		37 (44.0)	47 (56.0)		25 (29.8)	59 (70.2)		49 (58.3)	35 (41.7)		54 (64.3)	30 (35.7)
	Yes	256 (63.8)	145 (36.2)	0.52	246 (61.3)	155 (38.7)	0.299	181 (45.1)	220 (54.9)	0.135	230 (57.4)	171 (42.6)	0.791	182 (45.4)	219 (54.6)	0.746	156 (38.9)	245 (61.1)	0.08	253 (63.1)	148 (36.9)	0.387	215 ()	186 (46.)	0.111
DMFT		307 (63.3)	178 (36.7)	0.455	293 (60.4)	192 (39.6)	0.782	213 (43.9)	272 (56.1)	0.803	280 (57.7)	205 (42.3)	0.707	219 (45.2)	266 (54.8)	0.919	181 (37.3)	304 (62.7)	0.474	302 (62.3)	183 (37.7)	0.186	269 (55.5)	216 (44.5)	0.198
tC-OIDP, transferred Child Oral Impacts on Daily Performances score; sC-OIDP, the Child Oral Impacts on Daily Performances score that standardized to the Sichuan adolescent mean score; BOP, gingival bleeding on probing; DC, dental calculus; DMFT, decayed, missing, and filled teeth. # Adjusting for age, gender, household type and maternal education. *P < .05, **P < .01, ***P < .001 (highlighted in…
