# Supplementary material for: The correlation of region-specific lifestyle and subjective perception of oral health with oral health-related quality of life among Tibetan early adolescents in Ganzi: a cross-sectional study
Source: PeerJ. 2025 Jan 24;13:e18842. doi: 10.7717/peerj.18842 (PMC11771303; doi:10.7717/peerj.18842)
Supplement: Supplemental Information 4 [file peerj-13-18842-s004.xls]

## Sheet: Sheet2
gender:（male=1，female=2）	household type（Non-agricultural family=1，Agricultural family=2）	age	Maternal education (1.Never received formal education 2. Primary school education 3. Junior high school education;4. High school education;5. Secondary Vocational School Education;6. Tree-year college Education;7. Bachelor's Degree;8. Master’s degree or above;9. Unknown or orphan)	boarding at school (1. Yes 2. No)	Your brick tea consumption (1. Drink 2. Rarely or Never)	Brick tea consumption by your mother(1. Drink 2. Rarely or Never3.Unknown or orphan)	How do you evaluate your oral conditions?(1. Good or very good 2. Fair 3. Poor or very poor)	Have you had a toothache in the past 12 months 1. Yes 2. No 2. Unknown	Eating (0.no impact;3.little impact;2.moderate impact;1.severe impact)	Speaking (0.no impact;3.little impact;2.moderate impact;1.severe impact)	Cleaning teeth (0.no impact;3.little impact;2.moderate impact;1.severe impact)	Studing (0.no impact;3.little impact;2.moderate impact;1.severe impact)	Sleeping (0.no impact;3.little impact;2.moderate impact;1.severe impact)	Grinning (0.no impact;3.little impact;2.moderate impact;1.severe impact)	Emotion (0.no impact;3.little impact;2.moderate impact;1.severe impact)	Social contact (0.no impact;3.little impact;2.moderate impact;1.severe impact)	DMF-17	DMF-16	DMF-15	DMF-14	DMF-53/13	DMF-12	DMF-11	DMF-21	DMF-22	DMF-23	DMF-24	DMF-25	DMF-26	DMF-27	DMF-47	DMF-46	DMF-45	DMF-44	DMF-43	DMF-42	DMF-41	DMF-31	DMF-32	DMF-33	DMF-34	DMF-35	DMF-36	DMF-37	BOP-17	BOP-16	BOP-15	BOP-14	BOP-13
1	2	12	9	2	2	2	3	2	3	3	1	0	0	3	0	3	8	0	A	0	A	0	0	T	0	A	0	A	0	8	8	0	A	B	0	0	0	0	0	0	B	A	0	8	X	0	9	0	9
2	2	13	3	1	1	1	3	2	3	3	1	2	0	0	0	0	8	0	A	0	0	0	0	0	0	0	0	B	0	8	0	0	0	0	0	0	0	0	0	0	0	0	0	0	X	0	9	0	0
1	2	13	9	1	2	1	3	3	3	2	2	1	3	1	0	0	8	0	0	0	0	0	0	0	0	0	0	0	0	8	0	0	0	0	0	0	0	0	0	0	8	0	0	0	X	1	0	0	1
2	2	12	1	1	1	2	2	2	3	1	0	0	2	2	3	3	8	0	A	0	0	0	0	0	0	0	0	0	0	8	0	0	0	0	0	0	0	0	0	0	0	0	0	0	X	0	9	0	0
1	2	13	5	2	1	1	1	2	3	0	3	0	0	3	3	3	0	0	0	0	0	0	0	0	0	0	1	0	0	0	0	1	0	0	0	0	0	0	0	0	0	0	1	0	1	1	1	1	0
1	2	12	9	2	2	2	2	2	3	0	0	0	0	3	3	3	8	0	A	0	A	0	0	0	0	A	A	A	0	8	8	0	A	0	A	0	0	0	0	A	0	A	0	8	X	1	9	9	9
2	2	13	2	2	2	2	3	2	3	0	0	2	1	3	3	2	8	0	B	0	8	0	0	0	0	A	B	B	0	8	8	0	B	0	B	0	0	0	0	8	B	B	0	8	X	0	9	0	X
1	2	12	9	1	1	2	2	2	3	0	2	0	0	2	3	2	8	0	A	0	0	0	0	0	0	0	0	A	0	8	8	0	A	0	0	0	0	0	0	0	0	0	0	0	X	1	9	1	9
2	2	12	9	2	1	2	1	2	3	0	0	0	0	0	3	2	0	0	0	0	0	0	0	0	0	0	0	0	0	0	0	1	0	0	0	0	0	0	0	0	0	0	0	0	1	1	0	0	0
2	2	12	9	2	2	2	3	2	3	0	0	0	0	0	3	2	8	0	B	0	0	0	0	0	0	0	0	B	0	8	0	1	0	0	0	0	0	0	0	0	0	0	0	0	X	1	9	0	0
2	2	12	6	2	1	1	1	2	3	0	0	0	0	0	3	1	0	0	0	0	0	0	0	0	0	0	0	0	0	0	0	0	0	0	0	0	0	0	0	0	0	0	0	0	9	1	0	0	0
1	2	13	9	1	2	2	1	2	3	0	0	1	0	2	3	1	0	0	0	0	0	0	0	0	0	0	0	0	0	0	0	0	0	0	0	0	0	0	0	0	0	0	1	0	0	0	0	0	0
2	2	12	3	2	1	1	1	2	3	0	1	0	0	0	3	1	0	0	0	0	0	0	0	0	0	0	0	0	0	0	0	1	0	0	0	0	0	0	0	0	0	0	0	0	0	0	0	0	0
2	2	12	7	2	2	2	2	2	3	0	0	0	0	0	3	0	0	0	0	0	0	0	0	0	0	0	0	0	0	0	0	0	0	0	0	0	0	0	0	0	0	0	0	0	9	0	0	0	1
2	2	12	3	2	2	2	2	3	3	0	0	0	0	0	3	0	8	0	0	0	0	0	0	0	0	A	0	0	0	8	0	0	0	0	0	0	0	0	0	0	0	0	0	8	X	1	0	0	0
2	2	13	1	1	2	2	2	2	3	0	0	0	0	0	3	0	8	0	0	0	0	0	0	0	0	0	0	0	0	8	0	1	0	0	0	0	0	0	0	0	0	0	1	0	X	1	1	0	0
1	2	15	3	1	2	2	3	3	0	0	0	0	3	3	3	0	8	0	0	0	0	0	0	0	0	A	0	0	0	8	0	0	0	0	0	0	0	0	0	0	0	0	0	0	X	0	0	0	0
1	2	12	3	2	2	2	2	2	0	0	2	0	0	0	3	0	0	0	0	0	0	0	0	0	0	0	0	0	0	8	8	0	0	0	0	0	0	0	0	0	0	0	0	8	9	1	1	1	9
1	2	12	1	1	1	1	2	2	0	3	2	3	3	2	2	2	0	0	0	0	0	0	0	0	0	8	0	0	0	0	0	0	0	0	0	0	0	0	0	0	0	0	0	0	0	0	0	0	0
2	2	12	9	1	1	1	2	2	0	3	0	0	0	2	2	0	0	0	0	0	0	0	0	0	0	0	0	0	0	0	1	1	0	0	0	0	0	0	0	0	0	0	1	0	0	0	0	0	0
2	2	12	1	1	1	1	1	2	0	3	0	1	0	0	2	2	8	0	0	0	0	0	0	0	0	0	0	0	0	8	8	0	0	0	0	0	0	0	0	0	0	0	0	8	X	0	0	0	0
1	2	12	9	2	2	2	1	3	0	3	0	0	0	3	2	0	8	0	B	B	A	0	0	0	0	B	B	A	0	8	8	0	A	A	0	0	0	0	0	0	A	0	0	8	X	0	9	9	9
1	2	12	3	2	1	1	2	2	0	1	2	0	1	0	2	1	8	0	0	0	8	0	0	0	0	8	0	0	0	8	8	0	0	0	0	0	0	0	0	0	0	0	0	8	X	0	9	0	X
2	2	12	9	2	2	2	2	3	0	1	0	0	1	0	2	1	0	0	0	0	0	0	0	0	0	0	0	0	0	0	0	0	0	0	0	0	0	0	0	0	0	0	0	0	0	0	0	0	0
1	2	12	4	2	2	2	2	1	0	1	2	1	3	0	2	0	0	0	0	0	0	0	0	0	0	0	0	0	0	0	0	0	0	0	0	0	0	0	0	0	0	0	0	0	9	1	1	0	1
1	2	12	1	1	1	1	2	2	0	1	3	0	3	0	2	0	8	1	0	0	8	0	0	0	0	A	0	0	0	8	8	0	B	A	8	0	0	0	0	0	0	0	0	0	X	0	0	0	X
2	2	12	2	2	2	2	2	2	0	0	2	0	1	3	2	3	8	0	0	0	0	0	0	0	0	0	0	0	0	8	8	0	0	0	0	0	0	0	0	0	0	0	0	8	X	0	0	0	1
1	1	12	2	1	1	1	2	2	0	0	2	0	2	2	2	3	8	0	0	0	0	0	0	0	0	0	0	0	0	8	8	0	1	0	0	0	0	0	0	0	0	0	0	8	X	0	0	0	0
1	2	12	2	1	2	2	1	2	0	0	2	2	2	0	2	3	8	0	A	0	0	0	0	0	0	0	0	B	0	8	8	0	A	0	0	0	0	0	0	0	0	A	0	8	X	0	9	0	0
2	2	13	9	1	1	2	3	2	0	0	1	0	1	0	2	3	0	0	0	0	0	0	0	0	0	0	0	0	0	0	0	1	0	0	0	0	0	0	0	0	0	B	0	0	0	0	0	0	0
2	1	12	1	2	1	1	2	2	0	0	2	0	0	2	2	1	0	0	0	0	0	0	0	0	0	0	0	0	0	0	0	0	0	0	0	0	0	0	0	0	0	0	0	0	0	0	0	0	0
2	2	12	3	2	1	1	2	2	0	0	0	0	0	1	2	1	0	1	0	1	0	0	0	0	0	0	0	0	0	0	0	1	1	0	0	0	0	0	0	0	0	0	0	8	1	1	0	0	0
1	1	13	4	2	2	2	2	2	0	0	1	2	2	0	2	1	0	0	0	0	0	0	0	0	8	A	0	0	1	0	0	1	0	0	0	0	0	0	0	0	0	0	1	0	0	0	0	0	0
2	2	11	3	2	2	2	3	2	0	0	0	0	2	0	2	1	8	0	0	0	A	0	0	0	0	A	A	B	0	8	8	0	B	0	0	0	0	0	0	0	0	0	0	8	X	1	0	0	9
1	2	12	3	2	1	1	3	2	0	0	3	0	3	3	2	0	8	0	0	1	0	0	0	0	0	0	1	0	1	8	0	0	0	0	0	0	0	0	0	0	0	0	0	8	X	0	0	0	1
2	2	12	3	1	1	2	2	2	0	0	1	0	1	2	2	0	0	0	0	0	0	0	0	0	0	0	0	0	0	0	0	0	0	0	0	0	0	0	0	0	0	0	0	0	0	0	0	0	0
2	2	12	3	1	1	1	2	2	0	0	2	0	0	2	2	0	8	0	0	0	0	0	0	0	0	0	0	0	0	8	0	0	0	0	0	0	0	0	0	0	0	0	0	8	X	0	0	0	0
2	2	12	3	2	1	2	2	2	0	0	0	0	0	2	2	0	0	0	0	0	0	0	0	0	0	0	0	0	0	8	0	0	0	0	0	0	0	0	0	0	0	0	0	0	9	1	1	0	9
2	2	12	9	1	2	2	3	2	0	0	0	0	0	2	2	0	8	1	0	0	0	0	0	0	0	0	0	0	1	0	0	1	1	0	0	0	0	0	0	0	0	0	1	1	X	1	1	1	0
2	2	12	4	2	2	2	2	2	0	0	0	0	0	1	2	0	8	0	A	0	0	0	0	0	0	0	0	A	0	8	8	0	0	0	0	0	0	0	0	0	0	0	0	8	X	0	9	0	0
2	2	12	5	2	1	1	1	2	0	0	0	0	0	1	2	0	0	0	0	0	0	0	0	0	0	0	0	0	0	0	0	0	0	0	0	0	0	0	0	0	0	0	0	0	0	1	1	0	0
1	1	12	1	1	1	1	3	3	0	0	2	0	0	0	2	0	8	3	0	0	0	0	0	0	0	D	0	0	6	8	0	6	C	0	0	0	0	0	0	0	0	B	3	3	X	1	1	1	1
1	2	12	3	2	2	1	1	2	0	0	2	0	0	0	2	0	8	0	0	0	0	0	0	0	0	0	0	0	0	8	0	1	0	0	0	0	0	0	0	0	0	0	0	0	X	0	0	1	1
1	2	12	9	2	1	2	1	2	0	0	2	0	0	0	2	0	8	0	0	0	0	0	0	0	0	0	0	0	0	0	0	1	0	1	0	0	0	0	0	0	0	0	1	0	X	1	1	0	0
1	2	13	2	1	2	1	2	2	0	3	2	0	1	0	1	2	8	0	0	0	0	0	0	0	0	0	0	0	0	8	0	0	0	0	0	0	0	0	0	0	0	0	0	0	X	0	0	0	0
2	2	13	1	1	2	1	2	2	0	3	0	0	1	2	1	0	0	0	0	0	0	0	0	0	0	0	0	0	0	0	0	0	0	0	0	0	0	0	0	0	0	0	0	0	9	1	0	0	0
2	2	13	1	1	1	1	2	2	0	3	0	2	0	0	1	0	8	0	0	0	0	0	0	0	0	0	0	0	0	8	0	0	0	0	0	0	0	0	0	0	0	0	1	0	X	0	1	1	0
2	2	12	3	2	2	2	1	2	0	2	1	3	0	0	1	0	0	0	0	0	0	0	0	0	0	0	0	0	0	0	0	0	0	0	0	0	0	0	0	0	0	0	0	0	0	0	0	0	0
1	2	12	1	2	1	1	1	2	0	1	0	0	0	1	1	1	8	0	B	0	0	0	0	0	0	A	0	A	0	8	8	0	B	0	0	0	0	0	0	0	0	A	0	8	X	0	9	9	9
2	2	12	5	2	1	1	1	2	0	1	1	0	1	1	1	0	0	1	0	0	0	0	0	0	0	0	0	0	0	8	0	1	0	0	0	0	0	0	0	0	0	0	0	0	0	0	0	0	0
1	2	12	3	1	2	2	2	2	0	1	0	1	0	0	1	0	8	0	0	0	0	0	0	0	0	0	0	0	0	8	8	0	0	0	0	0	0	0	0	0	0	0	0	8	X	0	0	0	0
1	2	12	9	1	2	2	2	2	0	0	2	0	2	0	1	2	8	0	0	0	0	0	0	0	0	0	0	0	0	8	0	0	0	0	0	0	0	0	0	0	0	0	0	0	X	0	0	1	1
1	2	12	2	1	2	2	2	2	0	0	0	0	0	2	1	1	8	1	0	0	0	0	0	0	0	0	0	B	0	8	8	0	0	0	0	0	0	0	0	0	0	0	0	0	X	1	9	0	9
2	2	12	7	2	2	2	3	2	0	0	1	0	0	1	1	1	0	0	0	0	0	0	0	0	0	0	0	0	0	0	0	0	0	0	0	0	0	0	0	0	0	0	0	0	9	0	0	0	0
1	2	12	1	2	2	1	1	2	0	0	0	0	0	0	1	1	0	0	0	0	0	0	0	0	0	0	0	0	0	0	0	0	0	0	0	0	0	0	0	0	0	0	0	0	0	1	0	0	0
1	2	12	3	2	2	2	1	2	0	0	2	0	0	3	1	0	8	0	A	0	0	0	0	0	0	A	0	B	0	8	8	0	8	0	0	0	0	0	0	0	0	A	0	8	X	0	9	9	0
2	2	12	3	2	2	2	2	2	0	0	0	0	0	3	1	0	0	0	0	0	0	0	0	0	0	0	0	0	1	8	0	0	0	0	0	0	0	0	0	0	0	0	0	0	9	0	0	0	0
1	2	13	5	2	2	2	2	2	0	0	0	0	0	3	1	0	0	0	0	0	0	0	0	0	0	0	0	0	1	0	0	0	0	0	0	0	0	0	0	0	0	0	0	0	9	0	0	0	0
2	2	12	2	1	2	2	2	2	0	0	0	0	0	2	1	0	8	0	A	0	0	0	0	0	0	0	0	0	0	8	0	0	A	A	0	0	5	0	0	0	0	B	0	0	X	0	9	0	9
1	1	12	7	2	2	2	1	3	0	0	1	0	1	1	1	0	0	1	1	0	0	0	0	0	0	0	0	0	1	0	0	1	0	0	0	0	0	0	0	0	0	0	1	0	9	0	0	0	1
2	1	12	3	2	1	2	3	2	0	0	1	0	0	1	1	0	0	0	0	0	0	0	T	0	0	0	0	0	0	0	0	0	0	0	0	0	0	0	0	0	1	0	0	0	0	0	1	1	1
2	2	13	3	1	2	2	2	2	0	0	0	0	0	1	1	0	8	0	A	0	0	0	0	0	0	0	0	A	1	8	0	0	A	0	0	0	0	0	0	0	0	A	0	0	X	0	9	0	0
2	2	12	3	2	2	1	2	2	0	0	0	0	0	1	1	0	0	0	0	0	0	0	0	0	0	0	0	0	0	8	0	0	0	0	0	0	0	0	0	0	0	0	0	0	9	1	1	1	1
2	2	12	9	2	2	2	2	2	0	0	0	1	1	0	1	0	8	0	0	0	0	0	0	0	0	0	0	0	0	8	0	0	0	0	0	0	0	0	0	0	0	0	0	0	X	0	0	1	1
2	2	11	4	2	2	2	2	2	0	0	0	0	1	0	1	0	8	1	B	A	8	0	0	0	0	A	A	A	0	8	8	1	B	0	0	0	0	0	0	0	B	B	0	8	X	1	9	9	X
1	2	15	9	2	1	2	3	3	0	0	1	0	0	0	1	0	0	0	0	0	0	1	1	0	1	0	0	0	0	0	0	0	0	0	0	0	0	0	0	0	0	0	1	0	0	0	0	0	0
2	2	12	1	1	2	2	3	2	0	0	0	0	0	0	1	0	0	0	0	0	A	0	0	0	0	A	0	B	0	8	0	1	0	0	0	0	0	0	0	0	0	A	0	0	9	1	0	9	9
2	2	12	9	2	2	2	2	2	0	0	0	0	0	0	1	0	0	0	0	0	0	0	0	0	0	0	0	0	0	0	0	0	0	0	0	0	0	0	0	0	0	0	0	0	0	0	0	0	0
1	2	13	1	1	1	1	2	2	0	0	0	0	0	0	1	0	0	0	0	0	0	0	0	0	0	0	0	0	0	8	8	0	0	0	0	0	0	0	0	0	0	0	0	8	0	1	0	0	1
1	1	13	2	2	2	2	2	2	0	3	1	0	0	2	0	2	8	0	0	0	0	0	0	0	0	0	0	0	0	0	0	0	0	0	0	0	0	0	0	0	0	0	0	0	X	0	0	0	0
2	2	12	1	1	1	1	2	2	0	3	0	2	1	0	0	1	0	0	0	0	0	0	0	0	0	0	0	0	0	0	0	0	0	0	0	0	0	0	0	0	0	0	0	0	0	0	0	0	0
1	1	13	1	2	2	2	2	2	0	3	0	0	2	0	0	0	8	0	0	0	0	0	0	0	0	0	0	0	0	8	0	0	A	0	0	0	0	0	0	0	0	A	0	8	X	0	0	0	0
2	1	12	9	2	1	2	3	2	0	3	0	0	0	0	0	0	8	0	0	0	0	0	0	0	1	0	0	0	0	8	0	0	0	0	0	0	0	0	0	0	0	0	0	0	X	0	0	0	0
1	2	12	1	1	1	1	2	2	0	3	0	0	0	0	0	0	8	0	B	0	B	0	0	0	0	B	0	B	0	8	8	0	B	0	B	0	0	0	0	8	0	B	0	8	X	1	9	9	9
1	1	12	1	1	2	2	3	2	0	3	0	0	0	0	0	0	8	0	0	0	0	0	0	0	0	0	0	0	0	8	0	0	0	0	0	0	0	5	0	0	0	0	0	8	X	1	1	0	1
2	2	13	1	2	2	2	2	2	0	2	1	3	3	1	0	3	0	0	1	0	A	0	0	0	0	A	0	0	0	0	0	1	B	0	A	0	0	0	0	0	B	B	1	0	0	0	0	0	9
2	2	12	2	1	1	1	1	2	0	2	0	2	0	1	0	3	0	1	0	0	0	0	1	1	0	0	0	1	1	0	0	1	0	1	0	0	0	0	0	0	0	0	0	0	9	0	1	1	1
1	2	12	9	2	2	2	2	2	0	2	0	0	0	0	0	0	0	0	0	0	0	0	0	0	0	0	0	0	0	0	0	1	0	0	0	0	0	0	0	0	0	0	0	0	0	0	0	0	0
2	2	12	2	1	2	2	2	2	0	1	0	2	0	1	0	3	8	0	A	B	B	0	0	0	0	A	A	A	0	8	8	0	A	B	B	0	0	0	0	B	B	B	0	8	X	1	9	9	9
1	2	12	2	1	2	2	2	3	0	1	0	0	2	0	0	3	8	0	A	0	A	0	0	0	0	0	0	A	0	8	8	0	B	0	0	0	0	0	0	0	0	0	0	0	X	0	9	9	9
2	2	13	5	1	1	1	1	2	0	1	0	2	0	1	0	2	8	0	8	0	0	0	0	0	0	0	0	0	0	8	0	0	8	0	0	0	0	0	0	0	0	A	0	0	X	0	X	0	0
1	2	12	2	2	1	1	2	3	0	1	0	0	0	2	0	0	0	0	0	0	0	0	0	0	0	0	0	0	0	0	0	0	0	0	0	0	0	0	0	0	0	0	0	0	0	0	0	0	1
2	2	12	7	2	1	1	2	2	0	1	1	0	1	1	0	0	0	0	0	0	0	8	0	0	0	0	0	0	0	0	0	0	0	0	0	0	0	0	0	0	0	0	1	0	0	0	0	0	0
1	2	12	9	1	2	2	2	2	0	1	0	0	2	0	0	0	0	1	0	0	0	0	0	0	0	0	0	0	0	0	0	1	1	0	0	0	0	0	0	0	0	1	1	0	0	0	0	0	1
2	2		7	2	1	1	2	2	0	1	0	0	0	0	0	0	0	0	0	0	0	0	0	0	0	0	0	0	0	0	0	0	0	0	0	0	0	0	0	0	0	0	0	0	9	1	0	0	0
1	2	12	4	2	2	2	1	2	0	1	0	0	0	0	0	0	8	0	0	0	0	0	0	0	0	0	0	0	0	8	8	0	0	0	0	0	0	0	0	0	0	0	0	8	X	0	0	0	0
1	2	12	9	2	2	2	1	2	0	0	2	0	0	2	0	3	8	0	A	0	0	0	0	0	0	0	0	A	0	8	8	0	A	0	0	0	0	0	0	0	0	A	0	8	X	0	9	1	0
1	2	12	9	2	2	2	2	2	0	0	1	0	2	1	0	3	8	0	B	0	0	0	0	0	0	0	0	0	0	8	8	0	0	0	0	0	0	0	0	0	0	B	0	8	X	0	9	0	9
2	2	12	3	2	2	2	2	2	0	0	0	0	0	0	0	3	0	0	0	0	0	0	0	0	0	0	0	0	0	0	0	0	0	0	0	0	0	0	0	0	0	0	0	0	0	0	0	0	0
2	2	12	1	1	1	1	1	2	0	0	0	0	0	0	0	2	0	0	0	0	0	0	0	0	0	0	0	0	0	0	0	0	0	0	0	0	0	0	0	0	0	0	0	0	0	0	0	0	0
2	1	12	3	2	1	1	2	2	0	0	0	0	2	1	0	1	0	0	B	B	A	0	0	0	0	A	0	0	0	0	0	0	0	0	0	0	0	0	0	0	0	0	0	8	9	0	9	9	9
2	2	11	4	2	1	2	1	2	0	0	1	1	0	0	0	1	8	0	0	0	0	0	1	1	0	0	0	0	0	0	0	1	0	0	0	0	0	0	0	0	0	0	1	0	X	0	0	0	0
1	1	13	3	1	1	2	2	2	0	0	2	0	0	2	0	0	8	0	0	0	0	0	0	0	0	0	0	0	0	8	0	0	0	0	0	0	0	0	0	0	0	0	0	0	X	0	0	0	0
2	1	12	9	1	2	2	2	3	0	0	1	0	0	2	0	0	8	0	0	0	0	0	0	0	0	0	0	0	0	8	8	0	0	0	0	0	0	0	0	0	0	0	0	0	X	0	0	0	0
2	2	12	3	2	2	2	2	2	0	0	0	0	0	2	0	0	0	0	0	0	0	0	0	0	0	0	0	0	0	8	0	0	0	0	0	0	0	0	0	0	0	0	0	0	1	1	0	0	0
2	1	12	1	2	2	2	1	3	0	0	0	0	0	2	0	0	0	0	0	0	0	0	0	0	0	0	0	0	0	0	0	1	0	0	0	0	0	0	0	0	0	0	1	0	9	1	1	1	1
2	2	12	1	2	1	1	3	3	0	0	0	0	0	2	0	0	8	0	B	0	A	0	0	0	0	A	0	B	0	8	8	0	A	0	0	0	0	0	0	0	0	A	0	8	X	1	9	1	9
1	2	13	5	2	1	1	2	2	0	0	0	0	0	2	0	0	0	0	0	0	A	0	0	0	0	0	0	0	0	0	0	0	0	0	0	0	0	0	0	0	0	0	0	0	0	1	0	0	9
1	2	13	4	2	1	1	2	2	0	0	0	0	1	1	0	0	0	0	0	0	A	0	0	0	0	A	0	0	0	0	8	1	0	0	0	0	0	0	0	0	0	0	1	0	0	9	9	0	9
1	2	12	9	1	1	1	2	2	0	0	3	2	0	1	0	0	0	0	B	0	0	0	0	0	0	0	0	0	0	0	8	0	0	0	0	0	0	0	0	0	0	A	0	8	0	0	9	0	0
2	2	12	6	2	2	2	2	2	0	0	0	2	0	1	0	0	0	0	0	0	0	0	0	0	0	8	0	0	0	8	8	0	B	0	0	0	0	0	0	0	0	B	0	0	9	0	0	0	9
2	2	13	3	1	2	2	2	2	0	0	2	0	0	1	0	0	8	0	0	0	8	0	0	0	0	0	0	0	0	0	8	0	B	0	0	0	0	0	0	0	0	B	0	8	X	1	1	1	X
2	2	11	3	1	2	2	3	2	0	0	2	0	0	1	0	0	8	0	B	0	0	0	0	0	0	A	0	B	0	8	8	0	A	0	0	0	0	0	0	0	0	B	0	8	X	1	9	9	9
2	2	12	5	2	2	2	1	2	0	0	1	0	0	1	0	0	8	0	0	0	0	0	0	0	0	0	0	0	0	0	8	1	0	0	0	0	0	0	0	0	0	0	0	0	X	0	0	0	0
1	2	12	9	2	1	2	2	2	0	0	0	0	0	1	0	0	0	0	0	0	0	0	0	0	0	0	0	0	0	0	1	0	0	0	0	0	0	0	0	0	0	0	0	0	0	0	0	0	1
1	1	12	4	2	2	2	1	2	0	0	0	0	0	1	0	0	8	0	0	0	0	0	0	0	0	0	0	0	0	8	8	1	B	0	0	0	0	0	0	0	0	0	0	8	X	1	0	0	0
1	2	11	1	1	1	1	2	2	0	0	3	0	3	0	0	0	8	0	A	B	0	0	0	0	0	A	A	A	0	8	8	0	B	0	0	0	0	0	0	A	8	B	0	0	X	1	9	9	0
2	1	12	9	2	2	2	3	3	0	0	0	0	2	0	0	0	8	0	0	0	0	0	0	0	0	0	0	0	0	8	0	1	0	0	0	0	0	0	0	0	0	0	1	0	X	0	0	0	0
1	2	11	3	2	2	2	1	2	0	0	0	0	2	0	0	0	8	0	0	0	8	0	0	0	0	8	0	0	0	8	8	0	B	0	0	0	0	0	0	0	0	0	1	8	X	0	0	0	X
2	2	12	3	2	2	2	1	2	0	0	1	0	1	0	0	0	0	0	0	0	0	0	0	0	0	0	0	0	0	0	0	0	0	0	0	0	0	0	0	0	0	0	0	0	0	0	0	0	0
2	1	12	5	2	1	1	2	2	0	0	1	0	1	0	0	0	0	0	0	0	0	0	0	0	0	0	0	0	0	8	1	0	0	0	0	0	0	0	0	0	0	0	1	0	0	0	0	0	1
2	1	13	3	2	2	2	2	2	0	0	0	0	1	0	0	0	0	0	0	5	0	0	0	0	0	0	5	0	0	0	0	0	0	5	0	0	0	0	0	0	5	0	0	0	0	0	0	X	1
2	2	13	9	2	2	2	2	2	0	0	0	0	1	0	0	0	8	0	B	0	0	0	0	0	0	0	0	0	0	8	8	1	B	0	0	0	0	0	0	0	0	0	1	8	X	0	9	0	0
2	2	12	3	2	1	1	1	2	0	0	0	0	1	0	0	0	0	0	0	0	0	0	0	0	0	0	0	0	0	0	0	0	0	0	0	0	0	0	0	0	0	0	1	0	1	1	0	0	0
2	2	11	9	1	2	2	2	2	0	0	0	0	1	0	0	0	8	0	0	0	0	0	0	0	0	0	0	0	0	8	8	1	0	0	0	0	0	0	0	0	0	8	1	8	X	0	0	0	0
2	1	12	2	1	2	2	2	2	0	0	0	2	0	0	0	0	0	0	0	0	0	0	0	0	0	0	0	0	0	8	0	0	0	0	0	0	0	0	0	0	0	0	0	0	9	1	1	1	1
1	2	12	6	2	2	2	1	2	0	0	2	0	0	0	0	0	0	0	0	0	0	0	T	0	0	0	0	0	0	0	0	0	0	0	0	0	0	0	0	0	0	0	0	0	0	0	0	0	0
1	1	12	2	1	1	1	1	2	0	0	2	0	0	0	0	0	8	0	B	0	A	0	0	0	0	0	0	B	0	8	8	0	B	0	A	0	0	0	0	0	0	A	1	0	X	0	9	0	9
1	2	12	1	1	1	2	2	2	0	0	1	0	0	0	0	0	8	0	0	0	0	0	0	0	0	0	0	0	0	0	0	0	A	0	0	0	0	0	0	0	0	0	0	8	X	0	0	0	0
2	2	12	9	1	2	1	2	2	0	0	1	0	0	0	0	0	0	0	0	0	0	0	0	0	0	0	0	0	0	0	0	1	0	0	0	0	0	0	0	0	0	0	1	0	9	1	1	1	1
2	2	13	4	2	1	2	1	3	0	0	1	0	0	0	0	0	0	0	0	0	0	0	0	0	0	0	0	0	0	0	0	1	0	0	0	0	0	0	0	0	0	0	0	0	9	1	1	0	9
2	2	12	3	2	2	2	1	2	0	0	1	0	0	0	0	0	8	0	A	0	A	0	0	0	0	A	0	0	0	8	0	0	0	0	0	0	0	0	0	0	0	0	1	0	X	0	9	0	9
2	2	12	4	2	1	1	2	2	0	0	1	0	0	0	0	0	8	0	0	0	0	0	0	0	0	0	0	B	0	8	8	0	B	0	0	0	0	0	0	0	0	0	1	8	X	0	0	0	0
1	2	12	3	2	2	2	1	2	0	0	1	0	0	0	0	0	8	0	B	0	8	1	1	0	1	0	0	0	1	8	0	1	8	8	0	0	0	0	0	0	B	B	0	8	X	1	9	1	X
1	2	11	9	2	2	2	1	2	0	0	1	0	0	0	0	0	8	0	B	B	A	0	0	0	0	B	B	B	0	8	8	1	B	B	B	0	0	0	0	A	0	0	0	8	X	1	9	9	9
2	2	13	1	1	1	1	1	2	0	0	0	0	0	0	0	0	8	0	B	0	0	0	0	0	0	0	0	0	0	0	8	0	B	0	0	0	0	0	0	0	0	8	0	0	X	1	9	0	9
1	2	12	2	2	2	2	2	2	0	0	0	0	0	0	0	0	8	0	0	0	0	0	0	0	0	0	0	0	0	8	0	1	0	0	0	0	0	0	0	0	0	0	1	0	X	0	0	1	1
1	1	12	9	1	1	1	2	2	0	0	0	0	0	0	0	0	8	0	0	0	0	0	0	0	0	0	0	0	0	8	8	0	0	0	0	0	0	0	0	0	0	0	0	8	X	1	1	1	1
1	2	12	9	1	2	3	2	3	0	0	0	0	0	0	0	0	1	0	0	0	0	0	0	0	0	0	0	0	0	0	0	0	0	0	0	0	0	0	0	0	0	0	0	0	0	1	1	0	1
2	2	12	1	2	1	2	2	2	0	0	0	0	0	0	0	0	0	0	0	0	0	0	0	0	0	0	0	0	0	0	0	0	0	0	0	0	0	0	0	0	0	0	0	0	1	1	1	0	0
2	2	12	3	1	1	2	1	2	0	0	0	0	0	0	0	0	8	0	A	0	0	8	0	0	0	0	0	A	0	8	0	0	A	0	0	0	0	0	0	0	0	A	0	0	X	0	9	1	9
2	2	13	5	2	2	2	1	2	0	0	0	0	0	0	0	0	8	0	A	8	8	0	0	0	0	8	B	B	0	8	8	0	B	0	0	0	0	0	0	B	B	B	0	8	X	0	9	X	X
2	2	13	3	2	1	1	2	2	0	0	0	0	0	0	0	0	0	1	0	0	0	0	0	0	0	0	0	0	0	0	1	1	0	0	0	0	0	0	0	0	0	0	1	1	9	1	0	0	1
2	2	12	2	1	2	3	1	2	0	0	0	0	0	0	0	0	8	0	0	0	8	0	0	0	0	0	0	0	0	8	0	0	0	0	0	0	0	0	0	0	0	0	1	0	X	0	0	0	X
2	1	12	2	1	2	2	2	2	0	0	0	0	0	0	0	0	0	0	0	0	0	0	0	0	0	0	0	0	0	0	0	0	0	0	0	0	0	0	0	0	0	0	0	0	9	0	0	0	0
2	2	12	7	2	1	2	2	3	0	0	0	0	0	0	0	0	0	0	0	0	0	0	0	0	0	0	0	0	1	0	1	1	0	0	0	0	0	0	0	0	0	0	1	0	0	0	0	0	1
2	2	12	2	1	2	2	1	2	0	0	0	0	0	0	0	0	8	0	A	0	0	0	0	0	0	0	0	0	0	8	8	0	0	0	0	0	0	0	0	0	0	0	0	0	X	0	9	0	0
2	2	12	2	1	2	2	2	2	0	0	0	0	0	0	0	0	8	0	0	0	0	0	0	0	0	0	0	0	0	8	8	0	0	0	0	0	0	0	0	0	0	0	0	0	X	1	0	0	1
2	2	12	5	2	1	1	1	2	0	0	0	0	0	0	0	0	0	0	0	0	0	0	0	0	0	0	0	0	0	0	0	0	0	0	0	0	0	0	0	0	0	1	0	0	0	0	0	0	0
2	2	12	2	1	1	1	1	2	0	0	0	0	0	0	0	0	8	0	A	A	0	0	0	0	0	A	A	A	0	8	8	0	A	A	0	0	0	0	0	0	A	A	0	8	X	0	9	9	9
2	2	12	7	2	1	1	1	2	0	0	0	0	0	0	0	0	8	0	0	0	0	0	0	0	0	0	0	0	0	8	0	1	0	0	0	0	0	0	0	0	0	0	1	0	X	0	0	0	0
2	2	11	3	2	2	2	2	2	0	0	0	0	0	0	0	0	0	0	0	0	0	0	0	0	0	0	0	0	0	0	0	0	0	0	0	0	0	0	0	0	0	0	0	0	9	0	0	0	0
2	2	11	5	2	1	2	2	2	0	0	0	0	0	0	0	0	0	0	0	0	0	0	0	0	0	0	0	0	0	0	0	0	0	0	0	0	0	0	0	0	0	B	0	0	0	0	0	0	0
2	2	11	2	2	2	2	1	2	0	0	0	0	0	0	0	0	8	0	A	A	0	0	0	0	0	0	0	A	0	8	8	0	A	0	0	0	0	0	0	0	0	A	0	8	X	0	9	9	1
1	2	13	2	2	2	2	2	2	0	0	0	0	0	0	0	0	8	0	B	0	0	0	0	0	0	0	0	0	0	8	0	0	0	0	0	0	0	0	0	0	0	0	0	8	X	0	9	0	0
1	1	12	4	2	2	2	2	2	0	0	0	0	0	0	0	0	0	0	0	0	0	0	0	0	0	0	0	0	0	0	0	0	0	0	0	0	0	0	0	0	0	0	0	0	9	1	0	1	1
1	2	12	2	2	2	2	2	2	0	0	0	0	0	0	0	0	0	0	0	0	0	0	0	0	0	0	0	0	0	0	0	0	0	0	0	0	0	0	0	0	0	0	0	0	0	1	1	1	1
1	2	12	1	2	2	2	1	2	0	0	0	0	0	0	0	0	0	0	0	0	0	0	0	0	0	0	0	0	0	0	0	0	0	0	0	0	0	0	0	0	0	0	0	0	9	1	1	1	1
1	2	12	9	2	2	2	1	2	0	0	0	0	0	0	0	0	8	0	A	0	0	0	0	0	0	0	0	A	0	8	8	0	0	0	0	0	0	0	0	0	0	0	0	8	X	0	9	0	0
1	2	12	9	1	1	2	1	2	0	0	0	0	0	0	0	0	8	0	0	0	0	0	0	0	0	0	0	0	0	8	0	0	0	0	0	0	0	0	0	0	0	0	0	0	X	0	0	0	0
1	2	12	7	2	2	2	3	2	0	0	0	0	0	0	0	0	8	0	A	0	0	0	0	0	0	0	0	A	0	8	8	0	0	0	0	0	0	0	0	0	0	A	0	8	X	0	9	0	0
1	2	12	4	2	2	2	2	2	0	0	0	0	0	0	0	0	8	0	0	0	0	8	0	0	8	0	0	0	0	8	8	0	B	0	0	0	B	B	0	0	0	0	1	8	X	0	0	0	0
1	2	12	3	1	1	1	1	2	0	0	0	0	0	0	0	0	0	0	0	0	0	0	0	0	0	0	0	0	0	0	0	0	0	0	0	0	0	0	0	0	0	0	0	0	9	0	0	0	0
1	1	12	2	2	1	1	1	2	0	0	0	0	0	0	0	0	0	0	0	0	0	0	0	0	0	0	0	0	0	8	0	0	0	0	0	0	0	0	0	0	0	0	0	0	9	0	0	0	1
1	2	12	3	1	1	1	3	2	1	3	2	0	0	3	0	0	8	0	B	0	A	0	0	0	0	A	A	B	0	8	8	0	A	0	0	0	0	0	0	0	B	A	0	8	X	1	9	9	9
2	2	13	3	1	2	2	3	3	1	2	2	1	0	3	0	3	8	0	0	0	0	0	0	0	0	0	0	B	1	8	8	1	B	B	0	0	0	0	0	0	0	B	0	8	X	1	9	1	1
1	2	12	9	1	2	2	2	3	1	2	0	0	2	1	0	3	8	0	0	0	0	0	0	0	0	0	0	0	0	8	0	1	0	0	0	0	0	0	0	0	0	0	0	0	X	1	0	0	0
1	1	12	1	1	1	1	2	2	1	2	1	0	0	3	0	2	0	0	0	0	0	0	0	0	0	0	0	0	0	0	0	0	0	0	0	0	0	0	0	0	0	0	0	0	9	0	0	0	1
2	2	14	3	2	2	2	3	2	1	1	1	1	1	3	3	3	0	0	0	0	0	0	0	0	0	0	0	0	0	0	0	0	0	0	0	0	0	0	0	0	0	0	0	0	0	0	0	0	0
2	2	12	9	1	2	2	2	2	1	1	0	0	0	0	3	1	0	0	B	0	0	0	0	0	0	0	0	0	0	0	0	0	8	0	0	0	0	0	0	0	0	0	1	0	0	0	9	0	1
1	2	11	1	2	1	1	1	2	1	0	0	0	3	3	3	3	0	0	0	0	0	0	0	T	0	0	0	0	0	0	0	1	0	0	0	0	0	0	0	0	0	0	0	0	0	0	0	0	1
2	2	12	9	1	1	1	3	2	1	0	2	3	2	3	3	3	8	0	0	0	0	0	0	0	0	0	0	0	0	8	0	0	0	0	0	0	0	0	0	0	0	0	0	0	X	0	0	0	0
1	2	12	2	2	2	2	3	2	1	0	1	0	0	3	3	3	8	0	0	0	0	0	0	0	0	0	0	0	0	8	0	1	0	0	0	0	0	0	0	0	0	0	1	0	X	0	0	0	0
2	2	12	9	2	2	2	2	2	1	0	2	3	3	2	3	3	8	0	0	0	0	0	0	0	0	0	0	0	0	0	0	0	0	0	0	0	0	0	0	0	0	0	0	0	X	0	0	0	1
1	2	12	9	2	2	2	1	2	1	0	2	0	2	1	3	3	8	0	0	0	0	0	0	0	0	0	0	0	0	8	8	0	0	0	0	0	0	0	0	0	0	0	0	8	X	0	0	0	0
1	2	11	1	1	2	2	2	2	1	0	3	0	3	0	3	3	8	0	A	0	A	0	0	0	0	A	0	A	0	8	8	0	8	8	0	0	0	0	0	0	0	B	0	8	X	0	9	0	9
1	2	12	3	2	2	2	2	2	1	0	2	0	0	0	3	0	8	0	0	0	0	0	0	0	0	0	0	0	0	0	0	0	0	0	0	0	0	0	0	0	0	0	0	0	X	0	0	1	1
1	2	12	2	2	2	2	2	2	1	0	1	0	0	0	3	0	8	0	A	A	0	0	0	0	0	0	0	A	0	8	0	0	0	A	0	0	0	0	0	0	A	A	0	0	X	0	9	9	1
2	2	12	1	1	2	1	1	2	1	3	0	1	0	2	2	0	8	0	B	0	0	0	0	0	0	B	0	B	0	8	0	0	B	0	0	0	0	0	0	0	0	0	0	8	X	0	9	1	1
2	2	12	1	1	2	2	3	2	1	3	1	0	1	1	2	0	8	0	B	0	0	0	0	0	0	0	0	A	0	8	8	0	A	0	0	0	0	0	0	0	0	A	0	8	X	1	9	0	0
1	2	12	2	1	2	2	2	2	1	2	0	2	0	3	2	3	8	0	B	0	0	0	0	0	0	0	0	0	0	8	8	0	0	0	0	0	0	0	0	0	0	B	0	8	X	0	9	9	9
1	2	12	5	2	2	1	3	2	1	2	0	0	0	3	2	3	0	0	0	0	0	0	0	0	0	0	0	0	0	0	0	0	0	0	0	0	0	0	0	0	0	0	0	0	0	1	1	1	0
1	2	12	3	2	2	2	2	2	1	2	3	0	1	0	2	3	8	0	A	A	A	0	0	0	0	A	A	A	0	8	8	0	0	A	B	0	0	0	0	A	A	B	0	8	X	0	9	9	9
1	2	11	3	2	2	2	2	2	1	2	0	2	0	0	2	3	8	0	0	0	0	0	0	0	0	0	0	0	0	8	8	0	0	0	0	0	0	0	0	0	0	0	0	8	X	1	1	0	0
2	2	12	5	2	2	2	2	2	1	2	0	0	1	2	2	2	0	0	0	0	0	0	0	0	0	0	0	0	0	8	0	0	0	0	0	0	0	0	0	0	0	0	1	0	0	0	0	0	0
2	2	12	9	2	2	2	3	3	1	2	0	0	1	2	2	2	0	0	0	0	A	0	0	0	0	A	0	0	0	0	0	0	0	0	0	0	0	0	0	0	0	0	0	0	9	0	0	0	9
2	2	13	3	2	2	2	1	2	1	2	0	0	0	2	2	2	0	0	0	0	0	0	0	0	0	0	0	0	0	0	0	0	0	0	0	0	0	0	0	0	0	0	1	0	0	0	0	1	0
1	1	12	4	2	2	2	2	2	1	2	2	0	1	3	2	1	0	0	0	0	0	0	0	0	0	0	0	0	0	0	0	1	0	0	0	0	0	0	0	0	0	0	2	0	1	1	1	1	1
1	2	12	1	1	1	1	2	2	1	2	2	0	0	2	2	1	8	0	B	0	0	0	0	0	0	0	0	0	0	0	0	0	0	0	0	0	0	0	0	0	0	0	0	0	X	1	9	0	9
2	2	12	3	1	2	2	3	2	1	2	1	0	1	1	2	1	8	0	A	0	0	0	0	1	0	0	0	0	0	8	8	0	B	0	0	0	0	0	0	0	0	0	0	8	X	0	9	0	0
1	2	12	9	2	1	2	2	2	1	2	1	0	0	1	2	1	8	0	A	0	A	0	0	0	A	A	0	0	0	8	8	0	B	0	A	0	0	0	0	A	0	A	0	8	X	0	9	9	9
1	2	12	9	2	1	2	3	2	1	1	2	0	0	2	2	2	8	0	0	0	0	0	0	0	0	0	0	0	0	8	0	0	0	0	0	0	0	0	0	0	0	0	0	0	X	0	0	0	0
1	2	12	2	2	2	2	3	2	1	1	1	1	2	1	2	2	8	0	A	B	A	0	0	0	0	A	B	B	0	8	8	1	B	A	A	0	0	0	0	A	B	B	0	8	X	0	9	9	9
1	1	12	9	1	2	1	2	2	1	1	1	0	0	1	2	1	8	0	A	0	0	0	0	0	0	0	0	0	0	8	0	0	0	0	0	0	0	0	0	0	0	0	0	0	X	0	9	1	1
1	1	12	1	1	1	1	2	2	1	0	1	1	0	2	2	2	8	0	0	0	0	0	0	0	0	0	0	0	0	8	0	0	0	0	0	0	0	0	0	0	0	0	0	0	X	0	1	1	1
2	2	12	2	2	2	2	2	2	1	0	2	1	2	0	2	2	0	0	0	0	0	0	0	0	0	0	0	0	0	0	0	0	0	0	0	0	0	0	0	0	0	0	0	0	1	1	1	0	1
2	2	12	9	2	2	2	2	2	1	0	0	0	0	3	2	1	0	0	0	0	0	0	0	0	0	0	0	0	0	0	0	0	0	0	0	0	0	0	0	0	0	0	0	0	0	0	0	0	0
2	2	12	9	1	2	1	2	2	1	0	1	0	1	1	2	1	0	0	0	0	0	0	0	0	0	0	0	0	0	0	0	0	0	0	0	0	0	0	0	0	0	0	0	0	0	0	0	0	1
2	2	12	4	2	2	2	2	2	1	0	2	0	0	1	2	1	0	0	0	0	0	0	0	0	0	0	0	0	0	0	0	0	0	0	0	0	0	0	0	0	0	0	0	0	0	0	0	0	0
1	2	14	3	2	2	2	3	3	1	0	1	0	0	3	2	0	0	1	0	0	0	0	0	0	0	0	0	0	1	0	0	1	0	0	0	0	0	0	0	0	0	0	0	0	0	0	0	0	0
1	2	12	1	1	1	1	3	2	1	0	1	1	1	2	2	0	8	0	0	0	0	0	0	0	0	0	0	B	0	8	8	0	0	0	0	0	0	7	0	0	0	0	0	8	X	0	0	1	9
2	2	12	3	2	2	2	1	2	1	0	1	2	2	1	2	0	0	0	0	0	0	0	0	0	0	0	0	0	0	0	0	0	0	0	0	0	0	0	0	0	0	0	0	8	0	0	0	0	0
2	1	12	3	2	2	1	3	2	1	0	0	2	1	1	2	0	8	0	B	0	0	0	0	0	0	0	0	B	0	0	8	1	0	0	0	0	0	0	0	0	0	0	1	0	X	1	9	1	9
	2	12	3	2	2	2	2	2	1	0	0	0	0	1	2	0	0	0	0	0	0	0	0	0	0	0	0	0	0	0	0	0	0	0	0	0	0	0	0	0	0	0	0	0	0	0	0	0	0
2	2	12	3	2	1	2	1	2	1	0	0	2	1	0	2	0	0	1	0	0	0	0	0	0	0	0	0	0	0	8	0	1	0	0	0	0	0	0	0	0	0	0	1	0	0	1	1	1	9
2	2	13	3	2	2	2	2	2	1	0	0	2	0	0	2	0	0	0	0	0	0	0	0	0	0	0	0	0	0	0	0	0	1	0	8	0	0	0	0	8	0	0	0	0	1	1	0	0	1
1	2	13	9	2	1	1	2	3	1	0	3	0	0	0	2	0	8	0	0	0	0	0	0	0	0	0	0	0	0	8	0	0	0	0	0	0	0	0	0	0	0	0	0	8	X	1	1	1	1
2	1	12	1	2	1	1	2	2	1	0	0	0	0	0	2	0	0	3	0	3	0	0	0	0	0	0	0	0	3	8	0	3	B	0	0	0	0	0	0	0	0	A	3	0	1	1	9	1	9
2	2	13	4	2	2	2	1	3	1	0	0	0	0	0	2	0	0	0	0	0	0	0	0	0	0	0	0	0	1	0	0	0	1	0	0	0	0	0	0	0	0	0	1	0	0	0	0	1	1
2	2	12	9	2	2	1	3	2	1	3	1	1	0	1	1	0	8	0	0	0	0	0	0	0	0	0	0	0	0	8	0	1	0	0	0	0	0	0	0	0	0	0	1	0	X	0	0	0	0
2	2	12	9	1	2	1	1	2	1	3	1	1	0	1	1	1	0	0	0	0	0	0	1	1	0	0	0	0	0	0	0	0	0	0	0	0	0	0	0	0	0	0	1	0	9	1	0	0	1
1	2	12	2	2	2	2	2	2	1	3	0	0	0	2	1	0	8	0	B	0	8	0	0	0	0	0	0	0	0	8	8	0	A	0	0	0	T	0	0	0	0	B	0	0	X	0	9	0	X
2	2	12	5	2	1	1	3	2	1	2	1	1	0	3	1	3	0	0	0	0	0	0	0	0	0	0	0	0	0	0	0	2	0	0	0	0	0	0	0	0	0	0	0	0	9	0	0	0	0
2	2	13	3	2	1	2	3	2	1	2	0	2	3	2	1	1	0	0	0	0	0	0	0	0	0	0	0	0	0	0	0	0	0	0	0	0	0	0	0	0	0	0	0	0	9	1	0	0	0
2	2	12	2	2	2	2	2	2	1	2	0	0	0	1	1	0	0	0	0	0	0	0	0	0	0	0	0	0	0	0	0	0	0	0	0	0	0	0	0	0	0	0	0	0	9	0	0	0	1
1	2	13	5	2	2	2	2	2	1	2	0	1	0	0	1	0	0	1	0	0	0	0	0	0	0	0	0	0	0	0	0	1	8	0	0	0	0	0	0	0	1	0	1	1	9	1	1	1	1
2	2	12	3	2	1	1	2	2	1	2	0	0	0	0	1	0	0	0	0	0	0	0	0	0	0	0	0	0	0	8	1	1	0	0	0	0	0	0	0	0	0	B	1	0	0	0	1	1	0
1	2	12	9	1	2	2	1	2	1	1	0	0	0	1	1	2	8	0	0	0	0	0	0	0	0	0	0	0	0	8	0	0	0	0	0	0	0	0	0	0	0	0	0	8	X	1	1	1	0
1	2	12	1	2	2	2	2	2	1	1	1	0	0	1	1	1	8	0	B	A	A	0	0	0	0	B	B	B	0	8	8	0	B	B	B	0	0	0	0	B	B	0	0	0	X	1	9	9	9
2	2	12	9	2	1	2	2	2	1	1	1	2	0	1	1	0	8	0	0	0	0	0	T	0	0	0	0	0	0	8	8	0	0	0	0	0	0	0	0	0	0	0	0	8	X	0	0	0	0
2	2	12	3	1	1	1	2	2	1	1	2	0	0	1	1	0	0	0	0	0	0	0	0	0	0	0	0	0	0	0	0	1	0	0	0	0	0	0	0	0	0	0	0	0	9	0	0	0	0
2	2	12	4	2	1	2	1	2	1	0	0	0	0	1	1	2	0	0	0	0	0	0	0	0	0	0	0	0	0	0	0	1	0	0	0	0	0	0	0	0	0	0	0	0	9	0	0	1	1
2	2	12	3	2	2	2	2	2	1	0	0	0	2	0	1	2	0	0	0	0	0	0	0	0	0	0	0	0	0	0	1	1	0	0	0	0	0	0	0	0	0	0	1	0	0	0	0	0	0
2	2	12	3	1	2	2	2	2	1	0	0	1	1	0	1	2	0	1	0	0	0	0	0	0	0	0	0	0	1	0	0	1	0	0	0	0	0	0	0	0	0	0	1	1	9	1	1	0	1
1	2	12	5	1	1	1	2	2	1	0	0	0	2	3	1	1	0	0	0	0	0	0	0	0	0	0	0	0	0	0	0	0	0	0	0	0	0	0	0	0	0	0	0	0	0	0	0	0	0
2	2	12	9	2	2	2	3	2	1	0	2	3	2	1	1	1	0	0	0	0	0	0	0	0	0	0	0	0	0	0	0	0	0	0	0	0	0	0	0	0	0	0	1	0	0	0	0	0	0
2	2	12	2	2	1	1	2	2	1	0	1	1	1	1	1	1	0	0	0	0	0	0	0	0	0	0	0	0	0	8	0	0	0	0	0	0	0	0	0	0	0	0	0	0	9	0	1	1	0
1	2	12	9	2	2	2	2	2	1	0	2	0	2	0	1	1	0	0	0	0	0	0	7	7	0	0	0	0	0	0	0	0	0	0	0	0	0	0	0	0	0	0	0	0	0	0	0	0	0
1	2	12	2	2	2	2	3	3	1	0	2	0	0	0	1	1	8	0	A	0	A	0	A	0	0	0	0	0	0	8	0	0	0	0	0	0	0	0	0	0	0	0	0	8	X	0	9	0	9
2	2	13	2	2	1	2	1	2	1	0	0	0	0	0	1	1	0	0	0	0	0	0	0	T	0	0	0	0	0	0	0	1	0	0	0	0	0	T	0	0	0	0	0	0	1	1	1	0	0
2	2	12	1	1	2	2	2	3	1	0	0	0	1	3	1	0	8	0	A	0	0	0	0	0	0	0	0	0	0	8	0	0	B	0	0	0	0	0	0	0	0	0	0	0	X	0	9	0	0
1	2	11	4	2	2	2	2	2	1	0	1	0	2	2	1	0	8	0	B	A	A	0	0	0	0	8	8	0	0	8	8	0	B	A	A	0	1	0	0	8	0	B	1	8	X	0	9	9	9
2	1	12	1	1	1	1	2	2	1	0	1	1	0	2	1	0	8	0	0	0	0	0	0	0	0	0	0	0	0	8	0	1	0	0	0	0	0	0	0	0	0	0	1	0	X	0	0	0	0
2	2	12	3	2	2	2	2	2	1	0	0	0	0	2	1	0	8	0	0	0	0	0	0	0	0	0	0	0	0	8	0	1	0	0	0	0	0	0	0	0	0	0	1	0	X	0	1	0	1
1	2	12	3	2	2	2	3	2	1	0	0	0	0	2	1	0	0	0	0	0	0	0	0	0	0	0	0	0	0	0	0	1	0	0	0	0	0	0	0	0	0	0	0	0	0	0	0	1	1
1	2	12	9	2	2	2	2	2	1	0	0	1	0	1	1	0	0	0	0	0	0	0	0	0	0	0	0	0	0	0	0	0	0	0	0	0	0	0	0	0	0	0	1	0	0	0	0	0	0
1	2	12	9	2	2	2	3	3	1	0	0	1	0	1	1	0	8	0	0	A	A	0	0	0	0	A	0	0	0	0	8	0	A	0	0	0	0	0	0	0	0	0	0	8	X	0	0	9	9
1	2	12	2	2	2	2	3	2	1	0	1	0	0	1	1	0	0	0	0	0	0	0	0	0	0	0	0	0	0	0	0	0	0	0	0	0	0	0	0	0	0	0	0	0	0	0	0	0	0
1	2	13	4	2	2	2	2	2	1	0	0	0	0	1	1	0	0	0	0	0	0	0	0	0	0	0	0	0	0	0	0	0	0	0	0	0	0	0	0	0	0	0	0	0	0	0	1	1	0
2	2	12	2	1	1	1	2	3	1	0	2	0	2	0	1	0	0	0	0	0	0	0	0	0	0	0	0	0	0	0	0	1	0	0	0	0	0	0	0	0	0	0	1	0	9	1	0	0	0
1	1	12	2	2	2	2	2	3	1	0	0	2	0	0	1	0	0	0	0	0	A	0	0	0	0	0	0	0	0	0	0	0	0	0	0	0	0	0	0	0	0	0	0	0	0	1	1	1	9
2	2	12	3	2	2	2	2	2	1	0	2	0	0	0	1	0	8	0	0	0	0	0	0	0	0	0	0	0	0	8	0	0	0	0	0	0	0	0	0	0	0	0	0	0	X	1	1	1	9
2	2	12	3	2	2	2	2	3	1	0	1	0	0	0	1	0	0	0	0	0	0	0	0	0	0	0	0	0	0	0	0	0	0	0	0	T	0	0	0	0	0	0	0	0	9	9	9	9	9
2	2	12	2	1	2	2	2	2	1	0	0	0	0	0	1	0	8	0	0	0	0	0	0	0	0	0	0	0	0	8	0	0	0	0	8	0	0	0	0	8	0	0	0	0	X	1	0	0	0
1	2	12	3	1	1	1	2	2	1	0	0	0	0	0	1	0	0	0	0	0	0	1	0	0	0	0	0	0	0	0	0	0	0	0	0	0	0	0	0	0	0	0	0	0	0	0	0	0	0
1	2	11	3	2	2	2	2	2	1	0	0	0	0	0	1	0	8	0	B	0	A	0	0	0	0	A	B	B	0	8	8	0	B	0	0	0	0	0	0	0	0	B	0	8	X	0	9	0	9
1	2	11	9	1	2	2	2	2	1	3	2	1	1	2	0	0	8	0	0	0	0	0	0	0	0	0	0	0	0	8	0	1	0	0	0	0	0	0	0	0	0	0	1	0	X	0	0	0	0
2	1	12	9	2	2	2	2	2	1	3	0	0	1	0	0	0	0	0	0	0	0	0	0	0	0	0	0	0	1	0	0	1	A	0	0	0	0	0	0	0	0	A	0	8	0	0	0	0	0
2	2	12	9	2	2	2	2	3	1	3	0	1	0	0	0	0	0	0	0	0	0	0	0	0	0	0	0	0	0	0	0	1	0	0	0	0	0	0	0	0	0	0	1	0	0	0	0	0	0
1	2	14	2	1	1	2	1	3	1	3	0	0	0	0	0	0	0	0	0	0	0	0	0	0	0	0	0	0	0	0	8	1	4	0	0	0	0	0	0	0	0	0	1	0	0	0	0	0	0
1	2	12	6	2	2	2	2	3	1	3	0	0	0	0	0	0	0	0	0	0	0	0	0	0	0	0	0	0	0	0	0	1	0	0	0	0	T	T	0	0	0	0	1	0	0	0	0	0	0
1	2	12	9	2	2	2	3	3	1	3	2	0	1	0	0	3	8	0	0	0	0	0	0	0	0	0	0	0	0	8	8	0	0	0	0	0	0	0	0	0	0	0	0	8	X	1	1	0	1
2	2	12	1	2	2	2	2	2	1	3	1	2	0	0	0	0	0	0	0	0	0	0	0	1	1	0	1	0	1	0	0	0	0	0	0	0	0	0	0	0	0	0	1	1	0	0	0	0	0
2	2	12	9	1	1	1	2	2	1	2	0	0	0	2	0	2	0	0	0	0	0	0	0	0	0	A	0	0	1	0	0	1	0	0	0	0	0	0	0	0	0	0	0	0	9	0	0	0	0
1	1	12	1	1	2	1	2	3	1	2	0	0	0	2	0	2	8	0	A	0	0	0	0	0	0	0	0	A	0	8	8	0	0	0	0	0	0	0	0	0	0	0	0	8	X	0	9	1	0
1	2	12	3	1	1	2	3	1	1	2	0	3	2	3	0	0	8	0	B	0	0	0	0	0	0	0	0	0	0	8	8	0	0	0	0	0	0	0	0	0	0	1	0	0	X	0	9	0	0
2	1	12	1	1	1	1	3	2	1	2	3	0	0	3	0	0	0	0	0	0	0	0	0	0	0	0	0	0	0	0	1	0	0	0	0	0	0	0	0	0	0	0	0	0	0	0	0	0	0
2	2	13	9	2	2	2	2	2	1	2	0	1	2	0	0	0	8	0	0	0	A	0	0	0	0	0	0	0	0	8	0	0	0	0	0	0	0	0	0	0	0	0	0	0	X	0	0	0	9
1	2	12	1	1	1	1	2	2	1	1	0	0	0	0	0	2	0	0	0	0	0	0	0	0	0	0	0	0	0	0	0	0	0	0	0	0	0	0	0	0	0	0	0	0	0	0	0	0	0
2	2	12	2	2	2	2	1	2	1	1	2	0	2	2	0	1	0	0	0	0	0	0	0	0	0	0	0	0	0	0	0	0	0	0	0	0	0	0	0	0	0	0	0	0	0	0	0	0	0
2	1	12	3	2	2	2	3	2	1	1	2	0	0	1	0	1	0	0	0	1	0	2	2	2	0	0	0	0	0	0	0	0	0	0	0	0	0	0	0	0	0	1	0	0	9	1	0	0	0
2	2	12	4	2	2	2	2	2	1	1	1	1	1	0	0	1	0	0	0	0	0	0	0	0	0	0	0	0	0	0	0	0	0	0	0	0	0	0	0	0	0	0	0	0	0	0	0	0	0
2	1	12	9	2	2	2	3	2	1	1	1	2	0	3	0	0	0	0	0	0	0	0	0	0	0	0	0	0	0	0	0	0	0	0	0	0	0	0	0	0	0	0	0	0	9	1	1	0	0
2	2	12	2	2	1	1	2	2	1	1	1	0	3	2	0	0	0	0	0	0	0	0	T	0	0	0	0	0	0	0	0	0	0	0	0	0	0	0	0	0	0	0	0	0	1	1	0	0	0
1	2	12	9	1	2	2	3	2	1	1	0	1	1	0	0	0	0	0	0	0	0	0	0	0	0	0	0	0	0	0	0	0	0	0	0	0	0	0	0	0	0	0	0	0	0	0	0	0	1
1	2	12	3	2	2	2	1	2	1	1	0	0	0	0	0	0	8	0	B	B	A	0	0	0	0	A	B	B	0	8	8	0	0	0	0	0	0	0	0	0	0	B	1	8	X	0	9	9	9
2	2	13	3	2	2	2	2	2	1	0	2	0	0	0	0	3	8	0	0	0	0	0	0	0	0	0	0	0	1	0	0	0	0	0	0	0	0	0	0	0	0	0	1	0	X	0	0	0	0
1	1	12	4	2	2	2	3	2	1	0	0	1	0	1	0	1	0	1	0	0	0	0	0	0	0	0	0	0	0	0	0	1	0	0	0	0	0	0	0	0	0	0	0	0	0	0	0	0	0
2	2	13	7	2	1	2	2	2	1	0	0	0	0	1	0	1	0	0	0	0	0	0	0	0	0	0	0	0	0	0	1	0	0	0	0	0	0	0	0	0	0	0	0	1	0	0	0	1	1
2	2	13	1	2	1	1	2	2	1	0	0	0	0	0	0	1	0	0	0	0	0	0	0	0	0	0	0	B	1	0	0	0	0	0	0	0	0	0	0	0	0	0	0	0	0	0	0	0	0
1	2	12	2	1	1	1	2	3	1	0	0	0	0	0	0	1	0	0	A	0	0	0	0	0	0	0	0	B	0	0	0	0	B	0	0	0	0	0	0	0	0	B	1	0	0	0	9	0	0
1	2	12	5	2	2	2	1	2	1	0	0	0	0	3	0	0	0	0	0	0	0	0	0	T	0	0	0	0	0	0	0	1	0	0	0	0	0	0	0	0	0	0	1	0	0	1	1	0	1
2	2	12	2	1	2	2	2	2	1	0	2	2	0	2	0	0	8	0	B	B	A	0	0	0	0	A	B	B	0	8	8	0	A	B	0	0	0	0	0	0	B	B	0	8	X	1	9	9	9
2	2	12	3	2	1	1	2	2	1	0	3	1	0	2	0	0	0	0	0	0	0	0	0	0	0	A	0	B	0	0	0	0	0	0	0	0	0	0	0	0	0	0	0	0	0	1	1	1	1
2	2	12	2	2	2	1	2	2	1	0	2	0	0	2	0	0	8	0	0	0	0	0	0	0	0	0	0	0	0	8	0	0	0	0	0	0	0	0	0	0	0	0	0	0	X	0	0	0	1
2	2	12	6	2	2	2	1	2	1	0	0	0	0	2	0	0	0	0	0	0	0	0	0	0	0	0	0	0	0	8	0	0	0	0	0	0	0	0	0	0	0	0	0	0	9	1	1	1	1
1	2	12	3	1	1	1	2	2	1	0	1	2	2	1	0	0	8	0	0	0	0	0	0	0	0	B	0	0	0	8	8	0	B	0	0	0	0	0	0	0	B	B	0	8	X	0	0	0	0
2	2	12	9	1	2	2	2	2	1	0	1	1	0	1	0	0	0	0	0	0	0	0	0	0	0	0	0	0	0	0	0	0	0	0	0	0	0	0	0	0	0	0	0	0	0	0	0	0	1
2	2	12	1	1	1	1	2	2	1	0	1	0	0	1	0	0	8	0	0	0	0	0	0	0	0	0	0	0	0	8	0	0	0	0	0	0	0	0	0	0	0	0	0	0	X	0	0	0	0
2	2	13	7	2	1	1	1	3	1	0	0	0	0	1	0	0	0	0	0	5	0	0	0	0	0	0	0	0	0	0	0	1	0	0	0	0	0	0	0	0	0	0	0	0	0	1	1	X	1
2	2	12	3	1	1	1	2	2	1	0	0	0	0	1	0	0	0	0	0	0	0	0	0	0	0	0	0	0	0	0	0	0	0	0	0	0	0	0	0	0	0	0	0	1	0	1	0	1	1
1	2	12	1	1	2	2	1	2	1	0	0	0	0	1	0	0	8	0	0	0	0	0	0	0	0	0	0	0	0	8	0	0	0	0	0	0	0	0	0	0	0	0	0	0	X	1	1	1	1
2	2	12	1	2	1	1	2	2	1	0	2	0	2	0	0	0	0	0	0	0	0	0	0	0	0	0	0	0	0	0	0	0	0	0	0	0	0	0	0	0	0	0	0	0	0	0	0	0	0
2	1	12	9	1	2	2	2	2	1	0	1	0	2	0	0	0	0	0	0	0	0	0	0	0	0	0	0	0	0	0	0	0	0	0	5	0	0	0	0	5	0	0	0	0	0	1	0	0	0
2	2	12	5	2	2	2	2	2	1	0	1	0	1	0	0	0	0	0	1	0	0	0	0	0	0	0	0	0	0	0	1	1	0	0	0	0	0	0	0	0	0	0	0	1	0	0	0	1	1
2	2	12	2	1	2	2	2	2	1	0	1	0	1	0	0	0	8	0	0	0	0	0	0	0	0	0	0	0	0	8	0	1	0	0	0	0	0	0	0	0	0	0	1	0	X	0	0	0	0
2	2	11	7	2	2	2	2	2	1	0	0	0	1	0	0	0	0	0	0	0	0	0	0	0	0	A	0	0	0	0	0	1	0	0	0	0	0	0	0	0	0	0	1	0	9	0	0	0	1
2	2	12	9	2	2	2	1	2	1	0	1	2	0	0	0	0	8	0	0	0	0	0	0	0	0	0	0	0	0	8	0	1	0	0	0	0	0	0	0	0	0	0	1	0	X	0	0	0	0
2	2	12	9	1	2	2	2	2	1	0	1	1	0	0	0	0	8	0	0	0	0	0	0	0	0	0	0	B	1	8	0	1	B	B	0	0	0	0	0	0	0	0	1	0	X	0	9	9	9
1	2	12	2	2	1	1	1	2	1	0	1	1	0	0	0	0	8	0	A	0	A	0	0	0	0	A	0	A	0	8	8	0	A	A	0	0	0	0	0	A	0	A	0	8	X	0	9	0	9
2	2	11	3	2	2	2	2	2	1	0	0	1	0	0	0	0	0	1	0	0	0	0	0	0	0	0	0	0	0	8	0	1	0	0	0	0	0	0	0	0	0	0	1	0	9	1	0	0	9
1	2	12	2	1	2	2	2	2	1	0	2	0	0	0	0	0	8	0	0	0	0	0	0	0	0	0	0	0	0	0	8	0	0	0	0	5	0	0	0	0	0	0	0	8	X	0	0	0	0
2	2	14	9	2	2	2	2	2	1	0	2	0	0	0	0	0	0	0	0	0	0	0	0	0	0	0	0	0	0	0	0	0	0	0	0	0	0	0	0	0	0	0	0	0	0	0	0	0	0
2	2	12	9	2	2	2	2	2	1	0	2	0	0	0	0	0	8	0	B	0	A	0	0	0	0	A	0	0	0	8	0	0	0	0	0	0	0	0	0	0	0	0	0	0	X	0	9	0	9
2	2	12	3	2	2	2	1	2	1	0	1	0	0	0	0	0	0	0	0	0	0	0	0	0	0	0	0	0	0	0	0	0	0	0	0	0	0	0	0	0	0	0	0	0	9	1	1	0	0
2	2	12	2	1	2	2	1	2	1	0	1	0	0	0	0	0	8	0	0	0	0	0	0	0	0	0	0	0	0	8	0	0	0	0	0	0	0	0	0	0	0	0	0	0	X	1	1	0	1
1	2	14	5	2	1	1	2	2	1	0	1	0	0	0	0	0	0	0	0	0	0	0	0	0	0	0	0	0	0	8	0	0	0	0	0	0	0	0	0	0	0	0	0	0	0	1	1	0	0
1	1	13	3	1	1	1	1	2	1	0	1	0	0	0	0	0	0	0	0	0	0	0	0	0	0	0	0	0	0	0	0	0	0	0	0	0	0	0	0	0	0	0	0	0	0	0	0	0	0
1	2	12	2	1	2	2	2	2	1	0	1	0	0	0	0	0	8	0	0	0	0	0	0	0	0	0	0	0	0	8	0	0	0	0	0	0	0	0	0	0	0	0	0	0	X	0	0	0	0
1	2	12	1	2	2	2	2	2	1	0	1	0	0	0	0	0	8	0	A	0	A	0	0	0	0	8	0	A	0	8	8	1	A	A	A	0	0	0	0	0	0	A	1	8	X	0	9	0	9
1	1	11	3	1	2	2	2	2	1	0	1	0	0	0	0	0	8	0	B	0	A	0	0	0	0	A	0	0	0	0	8	1	0	0	A	0	0	0	0	A	0	8	1	8	X	1	9	0	9
2	1	12	4	2	2	2	1	3	1	0	0	0	0	0	0	0	0	0	0	0	0	0	0	0	0	0	0	0	0	0	0	0	A	0	0	0	0	0	0	0	0	0	0	0	0	0	0	0	0
2	2	12	3	2	2	2	2	2	1	0	0	0	0	0	0	0	0	0	0	0	0	0	0	0	B	0	1	0	0	0	0	1	0	0	0	0	0	0	0	0	0	0	1	0	9	1	1	0	0
2	2	12	2	1	2	2	2	2	1	0	0	0	0	0	0	0	0	1	0	0	0	0	0	0	0	0	0	0	1	0	1	1	0	0	0	0	0	0	0	0	0	0	2	0	0	0	0	0	1
2	2	12	4	2	2	2	2	2	1	0	0	0	0	0	0	0	8	0	0	0	0	0	0	0	0	0	0	0	0	8	0	1	0	0	0	0	0	0	0	0	0	1	1	0	X	1	1	1	1
2	1	12	2	2	2	2	2	2	1	0	0	0	0	0	0	0	8	1	A	0	0	0	0	0	0	0	0	A	0	8	8	0	B	0	0	T	T	T	0	0	0	B	1	8	X	1	9	9	9
2	2	12	2	1	2	2	2	2	1	0	0	0	0	0	0	0	8	0	0	0	8	0	0	0	0	8	0	0	0	8	8	0	0	0	0	0	0	0	0	0	0	0	0	8	X	1	1	0	X
2	2	12	2	1	2	1	2	2	1	0	0	0	0	0	0	0	8	1	0	0	0	0	0	0	0	0	0	0	1	8	0	1	0	0	0	0	0	0	0	0	0	0	1	0	X	0	9	0	1
1	1	12	1	2	1	2	2	2	1	0	0	0	0	0	0	0	0	0	0	0	0	0	0	0	0	0	0	0	0	0	0	0	0	0	0	0	0	0	0	0	0	0	0	0	0	0	0	0	0
1	2	12	3	2	2	2	2	2	1	0	0	0	0	0	0	0	0	0	0	0	0	0	0	0	0	0	0	0	0	0	1	1	0	0	0	0	0	0	0	0	0	0	1	0	0	1	1	0	0
1	2	12	3	2	2	2	2	2	1	0	0	0	0	0	0	0	0	0	0	0	0	0	0	0	0	0	0	0	0	0	0	0	0	0	0	0	0	0	0	0	0	0	0	0	0	0	0	0	0
1	2	12	3	1	2	2	1	2	1	0	0	0	0	0	0	0	8	0	0	0	0	0	0	0	0	0	0	0	0	8	0	0	0	0	0	0	0	0	0	0	0	0	0	0	X	1	0	0	1
1	2	12	9	2	2	2	1	2	1	0	0	0	0	0	0	0	8	0	A	0	0	0	0	0	0	0	0	A	0	8	8	0	0	0	0	0	0	0	0	0	0	0	0	8	X	0	9	0	0
1	2	12	3	2	1	1	2	2	1	0	0	0	0	0	0	0	0	0	0	0	0	0	0	0	0	0	0	0	0	0	1	1	0	0	0	0	0	0	0	0	0	0	1	0	1	0	0	1	1
1	2	12	7	2	1	1	1	2	1	0	0	0	0	0	0	0	0	1	0	0	0	0	0	0	0	0	0	0	0	0	0	0	0	0	0	0	0	0	0	0	0	0	0	8	0	0	0	0	0
1	2	12	9	2	1	2	1	1	2	3	2	0	0	3	0	2	0	1	0	0	0	1	1	1	0	0	0	0	1	0	1	1	0	0	0	0	1	1	0	0	0	0	0	1	0	1	0	0	0
1	2	12	2	1	2	2	2	2	2	2	2	3	2	3	0	3	0	0	0	0	0	0	0	0	0	0	0	0	0	0	0	0	0	0	0	0	0	0	0	0	0	0	0	0	0	0	0	0	0
1	2	12	2	1	1	1	2	3	2	2	0	2	0	3	0	3	8	0	B	0	0	0	0	0	0	0	0	0	0	8	8	0	A	0	0	0	0	0	0	0	0	A	0	8	X	0	9	0	9
2	2	13	2	2	1	1	3	3	2	2	1	2	0	1	0	3	8	0	0	0	0	0	0	0	0	0	0	A	0	8	0	0	0	0	0	0	0	0	0	0	0	0	0	0	X	1	1	0	0
2	1	12	3	1	2	1	2	2	2	2	0	0	0	3	0	2	8	0	B	0	0	0	0	0	0	0	0	0	0	8	8	0	0	0	0	0	0	0	0	0	0	B	0	8	X	0	9	0	0
1	1		4	2	1	2	2	2	2	1	0	2	3	2	3	3	8	0	B	0	0	0	0	0	0	0	0	B	0	8	8	0	B	0	0	0	0	0	0	0	0	B	0	8	X	1	9	9	9
1	2	11	9	1	2	2	2	2	2	1	1	1	0	0	3	3	8	0	B	0	0	0	0	0	0	0	0	A	0	8	0	0	0	0	0	0	0	0	0	0	0	0	0	0	X	0	9	9	9
1	2	12	2	1	1	1	1	2	2	1	1	1	1	2	3	2	8	0	0	0	0	0	0	0	0	0	0	0	0	8	0	1	1	0	0	0	0	0	0	0	0	0	0	0	X	0	0	1	1
1	2	15	2	1	2	2	2	2	2	1	0	0	0	0	3	0	8	0	0	0	0	0	0	0	0	0	0	A	0	8	0	0	0	0	0	0	0	0	0	0	0	0	0	0	X	0	0	0	0
1	2	12	2	1	1	2	1	2	2	1	0	0	0	0	3	0	8	0	A	0	0	0	0	0	0	0	0	0	0	8	8	0	A	0	0	0	0	0	0	0	8	A	0	8	X	0	9	0	0
1	2	12	2	2	2	2	2	2	2	0	0	0	0	3	3	3	8	0	0	0	0	0	0	0	0	0	0	B	0	8	0	0	0	0	0	0	0	0	0	0	0	0	0	0	X	1	0	0	0
2	1	12	2	2	1	1	1	2	2	0	2	2	0	0	3	3	0	0	0	0	0	0	0	0	0	A	0	B	0	0	0	0	0	0	0	0	0	0	0	0	0	0	0	0	9	0	9	0	0
1	2	11	4	2	2	2	1	2	2	0	1	0	2	1	3	2	8	0	0	0	0	0	0	0	0	A	0	B	0	8	8	1	B	0	0	0	0	0	0	B	B	8	1	0	X	0	0	0	9
1	2	12	9	1	2	2	2	2	2	0	3	2	0	0	3	2	8	0	A	0	A	0	0	0	1	0	0	0	0	8	8	0	A	0	0	0	5	5	0	0	0	A	0	8	X	0	9	0	9
2	2	13	3	1	2	1	3	2	2	0	2	0	0	0	3	1	8	0	B	0	A	0	0	T	0	A	0	B	0	8	8	0	B	B	0	0	0	0	0	0	B	A	0	8	X	0	9	0	9
1	2	12	3	1	2	2	2	2	2	0	3	0	0	0	3	0	8	0	0	0	0	0	0	0	0	0	0	A	0	8	0	0	A	0	0	0	0	0	0	0	0	A	0	0	X	1	9	9	9
2	1	12	1	2	1	1	2	2	2	0	2	0	0	0	3	0	8	0	B	0	0	0	0	0	0	0	0	A	0	8	8	0	B	0	0	0	0	0	0	0	0	A	0	8	X	0	9	0	1
1	2	12	5	2	2	2	2	2	2	0	0	0	0	0	3	0	0	0	0	0	0	0	0	0	0	0	0	0	0	0	0	0	0	0	0	0	0	0	0	0	0	0	0	0	0	0	0	1	1
2	2	12	6	2	1	1	2	2	2	0	2	0	2	0	3	0	8	0	0	0	0	0	0	0	0	0	0	0	0	8	0	0	0	0	0	0	0	0	0	0	0	0	0	0	X	0	1	0	0
2	2	12	3	2	1	2	3	1	2	0	0	0	0	0	3	0	0	0	0	0	0	0	0	0	0	0	0	0	0	0	0	0	0	0	0	0	0	0	0	0	0	0	0	0	9	0	0	0	0
2	2	12	9	1	1	1	2	2	2	3	1	2	0	3	2	0	8	0	A	A	A	0	0	0	0	A	A	A	0	8	8	1	A	B	A	0	0	0	0	A	0	A	0	8	X	0	9	9	9
1	1	12	9	1	1	1	1	2	2	2	1	0	2	3	2	3	8	0	0	0	0	0	0	0	0	A	0	0	0	8	0	0	0	0	0	0	0	0	0	0	0	8	0	0	X	0	0	0	1
1	2	13	2	1	2	2	2	2	2	2	0	2	2	2	2	2	8	0	0	0	A	0	0	0	0	A	0	A	0	8	0	0	0	0	0	0	0	0	0	0	0	A	0	0	X	0	0	0	9
1	1	12	2	1	1	1	2	2	2	2	2	0	2	2	2	2	8	0	B	0	8	0	0	0	0	8	0	B	0	8	8	0	0	0	0	0	0	0	0	8	0	0	1	8	X	0	9	0	X
1	1	12	1	1	1	1	1	2	2	2	1	0	0	2	2	2	8	6	0	6	0	0	0	T	0	0	6	0	6	8	8	6	6	6	0	0	0	0	0	0	6	6	6	0	X	0	0	0	0
1	2	12	2	2	2	2	2	2	2	2	3	0	0	1	2	2	0	0	0	0	0	0	0	0	0	0	0	0	0	0	0	0	0	0	0	0	0	0	0	0	0	0	0	0	0	0	1	1	0
2	1	12	2	1	1	1	2	2	2	2	3	1	1	0	2	1	8	0	0	0	0	0	0	0	0	0	0	0	0	8	8	0	0	0	0	5	0	0	0	0	0	0	0	8	X	0	0	0	0
1	1	12	9	1	1	1	2	2	2	2	0	0	0	2	2	0	0	0	0	0	0	0	0	0	0	0	0	0	0	0	0	0	0	0	0	0	0	0	0	0	0	0	1	0	9	1	0	1	1
2	1	12	1	1	2	1	3	1	2	1	3	3	3	3	2	3	8	0	B	0	0	0	0	0	0	0	0	0	0	8	8	1	8	0	0	0	0	0	0	0	0	0	0	0	X	1	9	1	1
1	2	12	9	2	2	2	2	2	2	1	2	0	0	2	2	1	0	0	0	0	0	0	0	0	0	0	0	0	0	0	0	0	0	0	0	0	0	0	0	0	0	0	0	0	0	0	0	0	0
2	1	12	1	1	1	1	2	2	2	1	3	2	2	2	2	0	0	0	0	0	0	0	0	0	0	0	0	0	0	0	0	0	0	0	0	0	0	0	0	0	0	0	0	0	9	1	1	0	1
1	2	12	5	1	2	2	3	2	2	1	3	1	2	1	2	0	8	0	B	0	0	0	0	0	0	A	A	A	0	8	8	1	A	0	0	0	0	0	0	0	0	0	1	8	X	0	9	9	9
1	2	12	2	1	1	1	2	2	2	1	2	1	2	1	2	0	8	0	A	A	0	0	0	0	0	0	0	A	0	8	0	0	A	0	0	0	0	0	0	0	8	A	0	8	X	0	9	9	9
1	1	12	9	1	2	1	2	2	2	1	2	2	2	0	2	0	0	0	0	0	0	0	0	0	0	0	0	0	0	0	1	1	0	0	0	0	0	0	0	0	0	0	1	0	9	0	1	1	1
2	2	12	1	2	1	1	1	2	2	1	0	0	2	0	2	0	8	0	0	0	0	0	0	0	0	0	0	0	0	8	0	0	0	0	0	0	0	0	0	0	0	0	0	0	X	1	0	0	9
1	2	12	3	2	2	1	2	2	2	1	2	1	0	0	2	0	0	0	0	0	0	0	0	0	0	0	0	0	0	0	0	0	0	0	0	0	0	0	0	0	0	0	0	0	0	0	0	0	0
2	2	11	3	2	1	1	3	2	2	1	1	1	0	0	2	0	0	0	0	0	0	0	0	0	0	0	0	0	0	0	0	0	0	0	0	0	0	0	0	0	0	0	1	0	0	0	0	0	0
2	2	12	3	1	2	2	3	2	2	0	1	2	3	3	2	3	8	0	B	0	0	0	0	1	0	0	0	0	0	8	8	0	0	0	0	0	0	0	0	0	0	0	0	0	X	0	9	0	0
2	1	12	3	1	1	2	2	2	2	0	3	1	1	0	2	3	0	0	0	0	0	0	0	0	0	0	0	B	0	0	0	0	A	0	0	0	0	0	0	0	0	A	0	0	0	0	0	0	0
2	2	12	1	1	2	2	1	2	2	0	0	0	2	2	2	2	0	0	0	0	0	0	0	0	0	0	0	0	0	8	0	0	0	0	0	0	0	0	0	0	0	0	0	0	9	0	0	1	0
2	2	12	1	1	2	2	2	2	2	0	0	0	2	2	2	2	8	0	0	0	0	0	0	0	0	A	0	0	1	8	8	0	A	0	0	0	0	0	0	0	8	B	1	8	X	0	9	0	9
2	2	12	2	1	2	2	2	2	2	0	2	0	0	2	2	2	8	1	0	0	0	0	0	0	0	0	0	1	0	8	0	0	0	0	0	0	0	0	0	0	0	0	1	0	X	0	0	0	1
1	2	12	5	2	2	2	3	2	2	0	1	0	0	2	2	2	8	0	B	0	0	0	0	0	0	0	0	B	0	8	8	0	B	0	0	5	0	0	0	0	0	0	0	8	X	0	9	0	1
2	2	13	9	2	2	2	1	2	2	0	1	0	0	1	2	2	0	0	0	0	0	0	0	0	0	0	0	0	0	0	0	1	0	0	0	0	0	0	0	0	0	0	0	0	0	0	0	1	1
1	1	12	3	1	1	1	2	1	2	0	1	0	3	0	2	2	0	0	0	0	0	0	0	0	0	0	0	0	0	0	0	0	0	0	0	0	0	0	0	0	0	0	0	1	1	1	1	1	1
2	1	12	4	2	1	1	2	2	2	0	2	0	2	0	2	2	8	0	0	0	0	0	0	0	0	0	0	0	0	0	0	0	0	0	0	0	0	0	0	0	0	0	0	0	X	0	0	0	0
2	2	12	2	1	2	2	2	2	2	0	1	0	0	0	2	2	8	0	0	0	0	0	0	0	0	0	0	0	0	8	8	0	0	0	0	0	0	0	0	0	0	0	0	0	X	0	0	0	0
1	1	12	9	1	2	1	3	2	2	0	1	1	1	3	2	1	8	0	0	0	0	0	0	0	0	0	0	0	0	8	0	0	0	0	0	0	0	0	0	0	0	0	0	0	X	0	0	0	1
1	1	12	3	1	2	2	1	2	2	0	1	0	0	3	2	1	8	0	0	0	0	0	T	0	0	0	0	0	0	8	8	0	0	0	0	0	0	0	0	0	0	0	0	8	X	0	0	0	1
2	1	12	1	1	1	1	2	2	2	0	2	2	0	2	2	1	8	0	0	0	0	0	0	0	0	0	0	0	0	0	8	0	0	0	0	0	0	0	0	0	0	0	0	8	X	0	0	0	1
1	2	12	2	2	2	2	3	2	2	0	2	2	0	2	2	1	0	0	0	0	0	0	0	0	0	0	0	B	0	8	8	0	B	0	0	0	0	0	0	0	0	A	0	8	0	0	1	1	1
1	2	12	3	2	2	2	2	2	2	0	0	0	1	0	2	0	0	0	0	0	0	0	0	0	0	0	0	0	0	8	0	0	0	0	0	0	0	0	0	0	0	0	1	0	9	1	0	0	1
2	2	12	9	2	2	2	1	2	2	0	0	0	0	0	2	0	0	0	0	0	0	0	0	0	0	0	0	0	0	8	0	0	0	0	0	0	0	0	0	0	0	0	0	8	0	0	0	0	0
2	1	12	5	2	2	2	1	2	2	2	0	0	0	1	1	2	0	0	0	0	0	0	0	0	0	0	0	0	0	0	0	0	0	0	0	0	0	0	0	0	0	0	0	0	0	0	0	0	0
1	1	12	1	1	1	1	2	2	2	2	0	0	2	1	1	1	8	0	B	0	0	0	0	1	0	A	0	0	0	8	8	0	B	0	0	0	0	0	0	0	0	0	0	0	X	1	9	0	0
1	2	12	2	1	1	1	3	2	2	2	2	0	0	0	1	0	8	0	0	1	0	0	0	0	1	0	0	0	0	8	0	1	0	0	0	0	0	0	0	0	0	0	1	0	X	0	0	0	1
1	2	12	7	2	2	2	3	2	2	1	2	1	1	1	1	2	8	0	0	0	0	0	0	0	0	0	0	0	0	8	8	0	0	0	0	0	0	0	0	0	0	0	0	8	X	1	1	1	1
2	2	12	9	2	1	2	3	2	2	1	0	0	1	1	1	2	0	0	0	0	0	0	0	0	0	0	0	0	0	0	0	0	0	0	0	0	0	0	0	0	0	0	0	0	0	1	1	1	1
1	2	12	1	1	2	2	1	2	2	1	0	0	0	0	1	2	8	0	A	0	0	0	0	0	0	0	0	0	1	8	8	0	A	0	0	0	0	0	0	0	0	A	0	8	X	1	9	1	0
2	2	12	2	1	2	2	2	2	2	1	2	0	3	1	1	1	0	0	0	0	0	0	0	0	0	0	0	0	0	0	0	0	0	0	0	0	0	0	0	0	0	0	0	0	0	0	0	0	0
1	2	12	9	2	1	2	3	2	2	1	1	0	0	1	1	0	8	0	0	1	B	8	0	0	0	A	0	1	1	8	8	0	B	B	8	0	0	0	0	0	B	B	0	8	X	0	9	1	9
1	2	12	9	1	1	1	2	2	2	1	0	0	2	0	1	0	0	0	0	0	0	0	0	0	0	0	0	0	0	0	0	0	0	0	0	0	0	0	0	0	0	0	0	0	0	0	0	0	1
1	2	12	9	2	2	2	3	2	2	1	1	1	1	0	1	0	8	0	0	0	0	0	0	0	0	0	0	0	0	8	0	0	0	0	0	0	0	0	0	0	0	0	0	0	X	0	0	0	0
2	2	12	2	2	1	2	2	2	2	0	2	1	1	2	1	3	0	0	0	0	0	0	0	0	0	0	0	0	0	0	0	0	0	0	0	0	0	0	0	0	0	0	0	0	9	1	0	0	1
1	2	12	3	2	1	2	2	2	2	0	0	0	0	1	1	2	0	0	B	0	0	0	0	0	0	B	0	B	0	0	0	0	0	0	0	0	0	0	0	0	0	0	0	0	9	0	9	1	9
2	2	12	9	1	2	1	1	2	2	0	1	0	2	0	1	2	8	0	0	0	0	0	0	0	0	0	0	0	0	8	8	0	0	0	0	0	0	0	0	0	0	0	0	8	X	0	0	0	0
2	2	12	1	2	2	1	1	2	2	0	0	0	0	1	1	1	0	0	0	0	0	0	0	0	0	A	0	A	0	0	0	0	A	0	0	0	0	0	0	0	0	0	0	0	9	0	0	0	0
1	2	12	9	2	2	2	2	1	2	0	2	1	3	0	1	1	8	0	A	A	A	0	0	0	0	B	0	B	0	8	8	0	B	0	0	0	0	0	0	0	0	B	0	8	X	0	9	9	9
1	2	12	4	2	2	2	2	2	2	0	2	1	1	0	1	1	8	0	A	0	0	0	0	0	0	0	0	A	0	8	0	0	B	0	0	0	0	0	0	0	0	B	0	0	X	0	9	0	9
2	2	12	6	2	2	1	1	1	2	0	0	0	0	0	1	1	0	0	0	0	0	0	1	1	0	0	0	0	0	0	1	1	0	0	0	0	0	0	0	0	0	0	0	0	0	0	0	0	0
2	1	12	7	1	2	2	2	2	2	0	1	2	0	2	1	0	8	0	0	0	0	0	0	0	0	0	0	0	0	8	0	0	0	0	0	0	0	0	0	0	0	0	0	0	X	0	0	0	0
2	2	12	9	2	2	2	3	2	2	0	0	0	0	2	1	0	8	0	0	0	0	0	0	0	0	0	0	0	0	8	0	0	0	0	0	0	0	0	0	0	0	B	0	0	X	1	0	0	1
1	2	13	1	1	2	2	3	2	2	0	0	0	3	1	1	0	8	0	0	0	0	0	0	0	0	0	0	0	0	8	8	0	0	0	0	0	0	0	0	0	0	0	1	0	X	0	0	0	0
2	2	13	2	1	1	1	2	1	2	0	2	0	2	1	1	0	0	0	0	0	0	0	0	0	0	0	0	0	0	0	0	0	0	0	0	0	0	0	0	0	0	0	0	0	0	0	0	0	0
1	2	12	1	2	1	1	3	2	2	0	0	2	0	1	1	0	0	0	0	0	0	0	0	0	0	0	0	0	0	0	0	0	0	0	0	0	0	0	0	0	0	0	0	0	0	0	0	0	1
2	2	12	3	1	2	2	3	2	2	0	0	0	0	1	1	0	8	0	A	A	0	0	T	0	0	0	0	A	A	8	8	0	A	0	0	0	0	0	0	0	0	B	0	8	X	0	9	9	0
2	1	12	7	2	1	1	1	2	2	0	2	2	1	0	1	0	0	0	0	0	0	0	0	0	0	0	0	0	0	8	0	0	0	0	0	0	0	0	0	0	0	0	0	0	0	0	0	0	0
2	2	12	9	2	2	2	1	2	2	0	0	0	1	0	1	0	0	0	0	0	0	0	0	0	0	0	0	0	0	0	0	1	0	0	0	0	0	0	0	0	0	0	1	0	0	1	0	0	0
2	2	12	5	2	1	2	3	2	2	0	1	1	0	0	1	0	8	0	0	0	8	0	0	0	0	0	0	0	0	8	8	0	0	0	0	0	0	0	0	0	0	B	0	8	X	0	0	0	X
1	2	12	1	1	1	1	3	2	2	0	0	0	0	0	1	0	0	0	0	0	0	0	0	0	0	8	0	0	0	0	0	0	0	0	0	0	0	0	0	0	0	0	0	0	0	0	0	0	0
2	2	12	1	2	2	2	2	2	2	3	1	0	0	0	0	0	0	0	0	0	0	0	0	0	0	0	0	0	0	0	8	0	0	0	0	0	0	0	0	0	0	0	0	0	0	0	0	0	0
2	2	12	9	1	2	3	2	2	2	2	0	2	2	3	0	2	8	0	0	0	0	0	0	0	0	0	0	0	1	8	8	0	A	0	0	0	0	0	0	0	0	0	0	8	X	0	0	0	0
1	2	12	3	1	2	2	2	2	2	2	1	2	0	1	0	0	8	0	0	0	0	0	0	0	0	0	0	0	0	8	8	0	0	0	0	0	0	0	0	0	0	0	0	8	X	0	0	0	0
2	2	11	3	1	2	2	2	2	2	2	0	2	2	0	0	0	8	0	0	0	0	0	0	0	0	0	0	0	0	8	8	0	A	0	0	0	0	0	0	0	0	0	0	8	X	0	0	0	0
2	2	12	2	2	2	2	1	2	2	2	2	0	0	0	0	0	0	0	0	0	0	0	0	0	0	0	0	0	0	0	0	0	0	0	0	0	0	0	0	0	0	0	0	0	1	1	1	1	1
2	2	12	3	1	2	2	3	2	2	1	0	1	1	3	0	0	8	0	B	0	0	0	0	0	0	0	0	8	0	0	0	0	0	0	0	0	0	0	0	0	0	0	0	0	X	0	9	0	1
1	2	12	2	2	2	2	2	2	2	1	2	0	2	1	0	0	8	0	A	0	0	0	0	0	0	0	0	A	0	8	8	0	0	0	0	0	0	0	0	0	0	0	0	8	X	0	9	0	0
1	1	12	9	2	2	2	3	2	2	1	3	0	1	0	0	0	8	0	B	0	0	0	0	0	0	0	0	0	1	8	8	0	0	0	0	0	0	0	0	0	0	0	1	8	X	0	9	0	0
2	1	12	9	2	2	2	1	2	2	1	3	1	0	0	0	0	8	0	0	0	0	0	0	0	0	0	0	0	0	0	0	0	0	0	0	0	0	0	0	0	0	0	0	0	X	0	0	1	1
2	2	12	2	2	1	1	1	2	2	1	1	0	0	0	0	0	8	0	0	0	0	0	0	0	0	0	0	B	0	8	8	0	B	0	0	0	0	0	0	0	0	A	0	0	X	0	0	0	1
2	2	12	9	2	2	2	2	3	2	1	0	0	0	0	0	0	0	0	0	0	0	0	0	0	0	0	0	0	0	8	0	0	0	0	0	0	0	0	0	0	0	0	0	0	9	0	0	0	0
2	2	12	5	1	1	1	2	2	2	1	0	0	0	0	0	0	0	3	0	0	0	0	0	0	0	0	0	0	3	0	0	3	0	0	0	0	0	0	0	0	0	3	3	0	0	0	0	0	0
1	2	12	1	2	1	1	1	2	2	0	1	2	2	0	0	2	0	0	0	0	0	0	0	0	0	0	0	0	0	0	0	0	0	0	0	0	0	0	0	0	0	0	0	0	0	0	0	0	0
2	1	12	5	2	1	1	2	2	2	0	1	2	0	3	0	1	8	0	0	0	0	0	0	0	0	0	0	0	0	8	8	0	0	0	0	0	0	0	0	0	0	0	0	8	X	0	0	0	0
1	2	12	7	2	2	2	3	3	2	0	1	0	0	3	0	1	0	0	0	0	0	0	0	0	0	0	0	0	0	0	0	0	0	0	0	0	0	0	0	0	0	0	0	0	0	0	0	0	0
1	2	12	2	1	2	2	3	2	2	0	1	0	1	1	0	1	8	0	A	A	A	0	0	0	0	A	A	A	0	8	8	0	A	A	A	0	0	0	0	A	A	A	0	8	X	0	9	9	9
2	2	12	1	1	1	1	3	1	2	0	0	2	1	0	0	1	8	0	0	0	0	0	0	0	0	0	0	0	0	0	8	0	B	0	0	0	0	0	0	0	0	A	0	0	X	0	0	0	0
1	2	12	6	2	1	2	1	2	2	0	0	0	1	0	0	1	0	0	0	0	0	0	0	0	0	0	0	0	0	0	0	0	0	0	0	0	0	0	0	0	0	0	0	0	9	0	0	0	0
2	1	12	5	2	2	1	3	2	2	0	0	2	1	3	0	0	0	0	0	5	0	0	0	0	0	0	5	8	9	0	0	0	0	5	0	0	0	0	0	0	5	0	0	0	9	9	1	9	1
2	2	12	4	2	2	2	2	2	2	0	0	2	0	3	0	0	8	0	A	0	0	0	0	0	0	0	0	0	1	8	0	0	B	0	0	0	0	0	0	0	0	0	0	0	X	0	9	0	0
2	1	12	3	1	1	2	2	2	2	0	3	1	1	2	0	0	0	1	1	0	0	0	0	0	0	0	0	1	1	0	0	1	0	0	0	0	0	0	0	0	0	0	1	1	0	0	0	0	0
2	2	12	1	1	1	2	2	2	2	0	0	2	0	2	0	0	8	0	0	0	0	0	0	0	0	0	0	0	0	8	0	0	1	0	0	0	0	0	0	0	0	0	0	0	X	0	0	0	0
1	2	12	1	1	2	2	2	3	2	0	0	0	0	2	0	0	8	0	B	0	0	0	0	0	0	0	0	0	0	8	8	0	0	0	0	0	0	0	0	0	0	0	0	0	X	1	9	1	1
2	2	12	9	1	1	1	2	3	2	0	0	2	2	1	0	0	0	0	0	0	0	0	0	0	0	0	0	0	0	0	0	1	0	0	0	0	0	0	0	0	0	0	1	0	0	1	0	0	0
2	2	12	2	2	2	2	2	2	2	0	1	1	0	1	0	0	8	0	0	0	0	0	0	0	0	0	0	0	0	8	0	0	0	0	0	0	0	0	0	0	0	0	0	0	X	0	0	0	0
2	2	12	9	1	2	2	1	2	2	0	1	0	0	1	0	0	8	0	0	0	0	0	0	0	0	0	0	B	0	8	0	0	0	0	0	0	0	0	0	0	0	1	1	0	X	0	0	0	0
2	2	12	3	1	2	2	2	1	2	0	1	2	3	0	0	0	8	0	0	0	0	0	0	0	0	0	0	0	0	8	8	0	0	0	0	0	0	0	0	0	0	0	0	8	X	1	1	0	0
2	1	12	9	1	2	2	3	3	2	0	0	1	2	0	0	0	8	0	0	0	0	0	0	0	0	0	0	0	0	8	8	0	0	0	0	0	0	0	0	0	0	0	0	0	X	1	0	0	0
1	2	11	3	2	2	2	2	2	2	0	1	2	1	0	0	0	8	0	B	A	A	0	0	0	0	0	0	0	0	8	8	0	B	B	0	0	0	0	0	0	A	B	0	8	X	0	9	9	9
1	2	11	3	1	2	2	3	2	2	0	2	0	1	0	0	0	8	0	0	0	0	0	0	0	0	0	0	0	1	8	1	1	0	0	0	0	0	0	0	0	0	0	0	8	X	1	1	1	0
2	2	13	2	1	2	2	2	2	2	0	1	0	1	0	0	0	8	0	1	0	B	0	0	0	0	A	0	A	0	8	0	1	B	0	0	0	0	0	0	0	0	1	1	0	X	1	0	0	9
2	2	12	2	1	2	2	1	2	2	0	0	1	0	0	0	0	8	0	A	A	A	5	0	0	5	A	0	A	0	8	8	0	A	0	8	0	0	0	0	A	A	A	0	8	X	0	9	9	9
1	2	12	1	1	1	1	2	2	2	0	0	1	0	0	0	0	8	0	0	0	0	0	T	T	0	0	0	0	0	0	0	0	0	0	0	0	0	0	0	0	0	0	0	0	X	1	0	0	0
1	1	12	9	2	2	2	2	3	2	0	2	0	0	0	0	0	0	0	0	0	0	0	0	0	0	0	0	0	0	0	0	0	0	0	0	0	0	0	0	0	0	0	0	0	9	0	0	0	0
1	2	12	9	2	2	2	2	2	2	0	1	0	0	0	0	0	8	0	A	A	A	0	0	0	0	A	0	A	0	8	8	0	A	0	0	0	0	0	0	0	A	A	0	8	X	0	9	9	9
2	2	12	3	2	2	2	2	2	2	0	1	0	0	0	0	0	0	0	0	0	0	0	0	0	0	0	0	0	0	0	1	0	0	0	0	0	0	0	0	0	0	0	1	0	1	1	1	1	1
2	2	11	2	2	2	2	2	2	2	0	0	0	0	0	0	0	8	1	A	0	0	0	0	0	0	0	0	B	0	8	8	1	8	0	0	0	0	0	0	0	0	0	1	8	X	0	9	1	1
2	1	12	9	2	2	2	1	2	2	0	0	0	0	0	0	0	8	0	0	0	0	0	0	0	0	0	0	0	0	8	0	0	0	0	0	0	0	0	0	0	0	0	0	0	X	1	1	1	1
2	2	12	1	1	2	2	2	2	2	0	0	0	0	0	0	0	8	0	0	0	0	0	0	0	0	0	0	0	0	0	0	0	0	0	0	0	0	0	0	0	0	0	1	0	X	0	0	0	0
2	2	12	3	2	2	2	2	2	2	0	0	0	0	0	0	0	8	0	0	0	0	0	0	0	0	0	0	0	0	0	0	4	0	0	0	0	0	0	0	0	0	0	0	0	X	0	0	0	0
1	1	12	2	2	2	2	2	2	2	0	0	0	0	0	0	0	0	0	0	0	0	0	0	0	0	0	0	0	0	0	0	0	0	0	0	0	0	0	0	0	0	0	0	0	9	0	0	0	1
1	2	12	7	2	2	2	2	2	2	0	0	0	0	0	0	0	0	0	0	0	8	0	0	0	0	0	0	0	0	0	0	0	0	0	0	0	0	0	0	0	0	0	1	0	0	0	0	1	X
1	2	12	1	2	2	2	2	2	2	0	0	0	0	0	0	0	0	0	0	0	0	0	0	0	0	0	0	0	0	0	0	0	0	0	0	0	0	0	0	0	0	0	0	0	0	0	0	0	0
1	2	12	2	1	2	2	2	2	2	0	0	0	0	0	0	0	8	0	B	0	A	0	0	0	0	A	A	A	0	8	8	0	0	0	0	0	0	0	0	0	A	A	0	8	X	0	9	9	9
1	2	11	2	1	2	2	1	2	2	0	0	0	0	0	0	0	8	0	A	0	A	A	0	0	0	A	A	A	0	8	8	1	A	0	A	0	0	0	0	0	0	A	0	8	X	0	9	9	9
1	1	12	9	1	1	1	3	1	3	3	3	3	3	3	0	3	8	0	0	0	0	0	0	0	0	0	0	0	0	8	0	1	0	0	0	0	0	0	0	0	0	0	1	0	X	0	0	0	1
1	2	12	3	2	2	2	2	2	3	3	2	2	1	3	0	1	0	0	0	0	0	0	0	0	0	0	0	0	1	0	0	0	0	0	0	0	0	0	0	0	0	0	1	0	0	0	0	0	0
2	2	13	9	2	2	2	1	2	3	2	0	2	3	3	0	3	8	0	A	0	0	0	0	0	0	0	0	A	0	8	8	0	B	0	0	0	0	0	0	0	0	B	0	8	X	0	9	0	0
2	2	12	1	1	1	1	3	2	3	1	2	3	3	2	0	3	0	0	0	0	0	0	0	2	0	0	0	0	0	0	1	0	0	0	0	0	0	0	0	0	0	0	1	0	0	0	0	0	0
1	2	12	3	1	1	1	3	1	3	1	3	3	3	3	3	2	0	0	0	0	0	0	0	0	0	0	0	0	0	0	0	0	0	0	0	0	0	0	0	0	0	0	0	0	0	0	0	0	0
2	2	12	1	1	2	2	2	2	3	1	0	0	0	0	3	0	8	0	0	0	0	0	0	0	0	0	0	0	1	8	0	1	0	0	0	0	0	0	0	0	0	0	0	0	X	1	0	0	9
2	2	13	6	2	2	2	2	2	3	1	1	0	3	0	3	0	0	0	0	0	0	0	0	0	0	0	0	0	0	0	0	1	0	0	0	0	0	0	0	0	0	0	1	0	0	0	0	0	0
1	2	13	2	1	1	2	3	1	3	0	0	0	0	3	3	3	8	0	0	0	0	0	0	0	0	0	0	0	0	8	8	0	A	B	0	0	0	0	0	0	B	B	0	8	X	1	0	1	9
2	2	11	4	2	1	1	3	2	3	0	3	0	0	1	3	3	0	0	0	0	A	0	0	0	0	A	0	0	0	0	0	0	0	0	0	0	0	0	0	0	0	0	0	0	9	0	0	0	9
2	2	12	2	1	1	1	3	2	3	0	1	0	0	1	3	2	8	0	A	8	A	0	0	0	8	0	8	A	0	8	8	1	A	0	0	0	0	0	0	0	0	A	1	8	X	0	9	X	9
1	2	12	9	1	2	2	3	1	3	0	2	2	1	2	3	1	8	0	0	0	0	0	0	0	0	0	0	0	0	8	8	0	0	0	0	0	0	0	0	0	0	0	0	8	X	1	0	0	1
2	2	13	1	1	1	1	1	2	3	0	0	0	0	0	3	0	0	0	0	0	0	0	0	0	0	0	0	0	0	0	0	0	A	0	0	0	0	0	0	0	0	0	0	0	9	0	1	0	0
2	2	12	2	1	1	1	1	1	3	0	2	0	3	2	3	0	8	0	0	0	0	0	0	0	0	0	0	0	0	8	8	0	0	0	0	0	0	0	0	0	0	0	0	8	X	0	0	1	1
1	2	12	3	2	1	1	2	2	3	0	2	0	1	2	3	0	0	0	0	0	0	0	0	0	0	0	0	0	0	0	0	1	0	0	0	0	0	0	0	0	0	0	0	8	0	1	0	0	0
2	2	12	9	2	2	2	3	2	3	0	0	3	0	2	3	0	8	0	0	0	0	0	0	0	0	0	0	0	0	8	8	0	0	0	0	0	0	0	0	0	0	0	0	8	X	1	1	1	1
1	2	12	2	1	1	1	2	1	3	2	3	2	2	2	2	2	8	0	A	0	A	0	0	0	0	B	0	B	0	8	0	0	A	0	0	0	0	0	0	0	0	A	0	0	X	1	9	1	9
2	2	12	2	1	2	1	2	1	3	2	2	2	2	2	2	2	8	0	0	0	0	0	0	0	0	0	0	0	0	8	0	0	B	0	0	0	0	0	0	0	0	B	0	0	X	0	0	0	1
2	2	12	2	2	2	1	3	2	3	2	1	0	0	1	2	1	0	0	0	0	0	0	0	0	0	0	0	0	0	0	1	1	0	0	0	0	0	0	0	0	0	0	1	1	0	0	0	0	0
1	1	12	2	1	2	2	2	3	3	2	1	2	1	0	2	0	8	0	A	0	0	0	0	0	0	0	0	A	0	8	8	1	A	0	0	0	0	0	0	0	0	0	0	0	X	0	9	9	9
1	2	14	2	2	2	2	3	2	3	2	2	3	0	0	2	0	8	0	0	0	0	0	0	0	0	0	0	0	0	8	8	0	0	0	0	0	0	0	0	0	0	0	0	8	X	1	1	9	1
1	2	13	2	1	1	1	1	2	3	2	3	2	0	0	2	0	8	0	8	0	0	0	0	0	0	0	0	B	0	8	8	0	B	0	0	0	0	0	0	0	0	B	0	8	X	1	X	0	0
2	2	13	2	2	1	1	2	2	3	1	2	3	3	3	2	3	8	0	B	0	A	0	0	0	0	A	B	B	0	8	8	0	0	0	0	0	0	0	0	0	0	0	0	8	X	0	9	9	9
1	2	13	3	2	1	2	2	2	3	1	2	2	2	3	2	2	0	0	0	0	0	0	0	0	0	0	0	0	0	0	0	0	0	0	0	0	0	0	0	0	0	0	0	0	1	1	0	0	1
2	1	12	1	1	1	1	2	2	3	1	2	2	2	0	2	1	8	0	0	0	0	0	0	0	0	0	0	0	0	8	8	0	0	0	0	0	0	0	0	0	0	0	0	8	X	0	0	0	0
1	2	13	2	1	2	2	2	2	3	1	0	0	2	2	2	0	8	0	A	A	A	0	0	0	0	A	A	A	0	8	8	0	A	A	B	0	0	0	0	B	0	0	0	8	X	0	9	9	9
2	2	12	4	2	2	2	2	2	3	0	2	2	2	2	2	2	0	0	0	0	0	0	0	0	0	0	0	0	0	0	0	0	0	0	0	0	0	0	0	0	0	0	0	0	9	1	0	0	9
1	2	11	4	1	2	1	2	2	3	0	2	3	3	1	2	2	0	0	0	0	A	0	0	0	0	0	0	0	0	0	0	0	0	0	0	0	0	0	0	0	0	0	0	0	0	0	0	0	9
1	2	12	6	2	2	1	2	2	3	0	1	0	1	3	2	0	0	0	0	0	0	0	0	0	0	0	0	0	1	0	0	1	1	1	1	1	1	1	1	1	1	0	1	0	9	1	1	1	9
1	2	12	2	2	1	1	3	2	3	0	1	0	2	0	2	0	8	0	B	0	A	0	0	0	0	A	0	B	0	8	8	0	A	A	0	0	0	0	0	0	A	A	0	8	X	0	9	0	9
1	2	12	1	2	2	2	2	1	3	0	0	0	2	0	2	0	8	0	A	0	0	0	0	0	0	0	0	A	0	8	8	0	A	0	0	0	0	0	0	0	0	B	0	8	X	0	9	0	9
2	2	12	1	1	1	1	2	3	3	0	0	1	0	0	2	0	0	0	0	0	0	0	0	0	0	0	0	0	0	0	0	0	0	0	0	0	0	0	0	0	0	B	0	0	0	0	0	0	1
1	2	12	2	1	1	1	3	2	3	1	3	3	1	2	1	1	0	0	0	0	0	0	0	0	0	0	0	0	0	0	0	0	0	0	0	0	0	0	0	0	0	0	0	0	0	1	1	0	0
2	2	12	4	2	2	2	2	2	3	1	1	3	3	0	1	0	0	0	0	0	0	0	0	0	0	0	0	0	0	0	0	0	0	0	0	0	0	0	0	0	0	0	0	0	0	1	0	0	0
1	2	12	2	2	2	2	1	2	3	0	0	0	0	3	1	2	8	0	0	0	0	0	0	0	0	0	0	A	0	8	8	0	0	0	0	0	0	0	0	0	0	A	0	8	X	0	1	0	0
1	2	12	2	2	1	1	2	2	3	0	1	1	3	2	1	2	8	0	0	0	0	0	0	0	0	0	0	0	0	8	8	0	0	0	0	0	0	0	0	0	0	0	0	0	X	1	0	0	0
1	1	12	2	1	1	1	1	1	3	0	0	0	0	2	1	2	8	0	A	A	A	0	0	0	0	A	A	A	0	8	8	0	A	B	A	0	0	0	0	A	A	A	0	8	X	0	9	9	9
2	1	11	1	1	2	1	1	2	3	0	2	2	0	2	1	1	8	0	0	0	0	0	0	0	0	0	0	0	0	8	0	1	0	0	0	0	0	0	0	0	0	0	1	0	X	1	1	1	0
2	2	12	2	2	1	1	2	1	3	0	1	2	2	1	1	1	0	0	0	0	0	0	0	0	0	0	0	0	0	0	0	1	0	0	0	0	0	0	0	0	0	0	0	0	1	1	1	1	1
1	2	13	3	2	2	2	2	2	3	0	0	0	1	1	1	1	8	0	0	1	8	0	0	0	0	0	0	1	0	8	8	0	0	0	0	0	0	0	0	0	0	B	0	8	X	1	0	0	X
1	2	12	2	2	1	2	2	2	3	0	0	0	0	1	1	1	0	0	0	0	0	0	0	0	0	0	0	0	0	0	0	0	0	0	0	0	0	0	0	0	0	0	0	0	0	0	0	0	1
1	2	13	3	2	2	2	3	2	3	0	1	2	3	0	1	0	0	0	0	0	0	0	0	0	0	0	0	0	0	0	0	0	0	0	0	0	0	0	0	0	0	0	0	0	0	0	0	0	0
2	2	13	1	1	2	1	2	2	3	0	0	0	3	0	1	0	0	0	0	0	0	0	0	0	0	0	0	0	0	0	0	0	0	0	0	0	0	0	0	0	0	0	0	0	9	0	0	1	0
2	2	12	1	1	1	1	2	2	3	2	0	2	0	0	0	3	0	0	0	0	0	0	0	0	0	0	0	0	0	8	8	0	0	0	0	0	0	0	0	0	0	0	0	8	0	0	0	0	0
1	2	13	3	1	1	2	2	2	3	2	1	3	0	2	0	2	8	0	0	0	0	0	0	0	0	0	0	0	0	8	0	0	0	0	0	0	0	0	0	0	0	0	0	0	X	0	0	0	0
1	2		2	1	2	2	1	2	3	2	0	0	0	0	0	0	0	0	0	0	0	0	0	0	0	0	0	0	0	0	0	0	0	0	0	0	0	0	0	0	0	0	0	0	0	0	0	0	0
2	2	12	9	1	1	1	1	2	3	1	0	0	0	0	0	0	0	0	0	0	0	0	1	1	0	0	0	0	0	8	0	1	0	0	0	0	0	0	0	0	0	0	1	0	0	0	0	0	0
2	2	12	2	1	2	1	2	2	3	0	0	3	3	1	0	2	8	0	A	B	A	0	0	0	0	A	B	B	0	8	8	0	0	B	0	0	0	0	0	0	8	A	0	8	X	1	9	9	9
1	2	12	4	1	2	2	1	2	3	0	2	1	3	2	0	0	0	0	0	0	0	0	0	0	0	0	0	0	0	0	0	0	0	0	0	0	0	0	0	0	0	0	0	0	0	1	0	0	0
1	2	12	2	1	2	2	3	2	3	0	0	2	0	2	0	0	8	3	0	0	0	0	0	0	0	0	0	0	3	8	0	3	1	0	0	0	0	0	0	0	0	1	3	0	X	1	0	0	1
1	2	12	1	2	2	2	1	2	3	0	0	0	0	2	0	0	8	0	0	0	0	0	0	0	0	0	0	0	1	8	8	1	0	0	0	0	0	0	0	0	0	0	1	8	X	1	0	0	0
2	2	12	1	1	1	2	3	1	3	0	0	0	3	1	0	0	8	1	0	0	0	0	0	0	0	0	0	0	0	8	0	1	0	0	0	0	0	0	0	0	0	0	1	0	X	1	0	0	1
2	2	12	2	2	2	2	2	2	3	0	3	1	0	1	0	0	0	0	0	0	0	0	0	0	0	0	0	0	0	0	0	0	0	0	0	0	0	0	0	0	0	0	0	0	9	1	1	0	0
1	1	12	1	2	1	1	2	2	3	0	2	0	1	0	0	0	0	1	0	0	0	0	0	0	0	0	0	0	1	0	0	1	0	0	0	0	0	0	0	0	0	0	1	0	9	0	0	0	0
2	2	12	3	2	2	2	1	2	3	0	0	2	0	0	0	0	8	0	0	0	0	0	1	1	0	0	0	0	0	8	0	1	0	0	0	0	0	0	0	0	0	0	0	0	X	0	0	0	0
1	2	11	2	1	1	2	3	2	3	0	0	2	0	0	0	0	0	1	0	0	0	0	0	0	0	0	0	0	0	0	0	0	0	0	0	0	0	0	0	0	0	0	0	0	0	1	0	0	0
2	2	12	6	2	2	2	2	2	3	0	0	1	0	0	0	0	0	0	0	0	0	0	0	0	0	0	0	0	0	0	0	0	0	0	0	0	0	0	0	0	0	0	0	0	0	0	0	0	0
2	1	12	4	1	2	2	3	2	3	0	3	0	0	0	0	0	0	0	0	0	0	0	0	0	0	0	0	0	0	0	0	0	0	0	0	0	0	0	0	0	0	0	0	0	0	0	0	0	0
2	2	12	6	2	1	1	1	2	3	0	0	0	0	0	0	0	0	0	0	0	0	0	0	0	0	0	0	0	0	0	0	0	0	0	0	0	0	0	0	0	0	0	0	0	0	0	0	0	0
1	2	12	1	1	1	1	3	2	3	0	0	0	0	0	0	0	0	0	0	0	0	0	0	0	0	0	0	0	1	0	0	0	0	0	0	0	0	0	0	0	0	0	0	0	0	1	0	0	1
1	2		3	2	2	2	2	1	3	0	0	0	0	0	0	0	8	0	0	0	0	0	0	0	0	0	0	0	0	8	0	4	0	0	0	0	0	0	0	0	0	0	1	0	X	0	9	0	0
[truncated: 51 more columns]

## Sheet: Sheet1
					0
					0
					0
					0
					0
					0
					0
					0
					0
					0
					0
					0
					0
					0
					0
					0
					0
					0
					0
					0
					0
					0
					0
					0
					0
					0
					0
					0
					0
					0
					0
					0
					0
